# Supplementary material for: One-pot three component synthesis of 5-allyl-1,2,3-triazoles using copper(i) acetylides
Source: Royal Society of Chemistry journal article supplement (doi:10.1039/c7ra12889d), 2018-01-01

## Electronic Supplementary Information

# One-Pot Three Component Synthesis of 5-Allyl-1,2,3-Triazoles Using Copper(I) Acetylides

Parigi Raghavendar Reddy, Lianji Cui and Jae-Sang Ryu\*

College of Pharmacy & Graduate School of Pharmaceutical Sciences, Ewha Womans  
University, 52 Ewhayeodae-gil, Seodaemun-Gu, Seoul 03760, Republic of Korea.

AUTHOR EMAIL ADDRESS: ryuj@ewha.ac.kr

CORRESPONDING AUTHOR FOOTNOTE: Fax+82 2 3277 2851; Tel: +82 2 3277 3008

### Table of Contents

|                                                       |          |
|-------------------------------------------------------|----------|
| <sup>1</sup> H-NMR & <sup>13</sup> C-NMR of <b>3a</b> | page S2  |
| <sup>1</sup> H-NMR & <sup>13</sup> C-NMR of <b>3b</b> | page S3  |
| <sup>1</sup> H-NMR & <sup>13</sup> C-NMR of <b>3c</b> | page S4  |
| <sup>1</sup> H-NMR & <sup>13</sup> C-NMR of <b>3d</b> | page S5  |
| <sup>1</sup> H-NMR & <sup>13</sup> C-NMR of <b>3e</b> | page S6  |
| <sup>1</sup> H-NMR & <sup>13</sup> C-NMR of <b>3f</b> | page S7  |
| <sup>1</sup> H-NMR & <sup>13</sup> C-NMR of <b>3g</b> | page S8  |
| <sup>1</sup> H-NMR & <sup>13</sup> C-NMR of <b>3h</b> | page S9  |
| <sup>1</sup> H-NMR & <sup>13</sup> C-NMR of <b>3i</b> | page S10 |
| <sup>1</sup> H-NMR & <sup>13</sup> C-NMR of <b>3j</b> | page S11 |
| <sup>1</sup> H-NMR & <sup>13</sup> C-NMR of <b>3k</b> | page S12 |
| <sup>1</sup> H-NMR & <sup>13</sup> C-NMR of <b>3l</b> | page S13 |
| <sup>1</sup> H-NMR & <sup>13</sup> C-NMR of <b>3m</b> | page S14 |
| <sup>1</sup> H-NMR & <sup>13</sup> C-NMR of <b>3n</b> | page S15 |
| <sup>1</sup> H-NMR & <sup>13</sup> C-NMR of <b>3o</b> | page S16 |
| <sup>1</sup> H-NMR & <sup>13</sup> C-NMR of <b>3p</b> | page S17 |
| <sup>1</sup> H-NMR & <sup>13</sup> C-NMR of <b>3q</b> | page S18 |
| <sup>1</sup> H-NMR & <sup>13</sup> C-NMR of <b>3r</b> | page S19 |
| <sup>1</sup> H-NMR & <sup>13</sup> C-NMR of <b>3s</b> | page S20 |
| <sup>1</sup> H-NMR & <sup>13</sup> C-NMR of <b>3t</b> | page S21 |
| <sup>1</sup> H-NMR & <sup>13</sup> C-NMR of <b>3u</b> | page S22 |
| <sup>1</sup> H-NMR & <sup>13</sup> C-NMR of <b>3v</b> | page S23 |
| <sup>1</sup> H-NMR & <sup>13</sup> C-NMR of <b>3w</b> | page S24 |
| <sup>1</sup> H-NMR & <sup>13</sup> C-NMR of <b>3x</b> | page S25 |
| <sup>1</sup> H-NMR & <sup>13</sup> C-NMR of <b>3y</b> | page S26 |
| <sup>1</sup> H-NMR & <sup>13</sup> C-NMR of <b>3z</b> | page S27 |
| <sup>1</sup> H-NMR & <sup>13</sup> C-NMR of <b>6v</b> | page S28 |
| <sup>1</sup> H-NMR & <sup>13</sup> C-NMR of <b>6w</b> | page S29 |
| <sup>1</sup> H-NMR & <sup>13</sup> C-NMR of <b>6x</b> | page S30 |
| <sup>1</sup> H-NMR & <sup>13</sup> C-NMR of <b>6y</b> | page S31 |
| <sup>1</sup> H-NMR & <sup>13</sup> C-NMR of <b>6z</b> | page S32 |

$^1\text{H-NMR}$  &  $^{13}\text{C-NMR}$  of **3a**

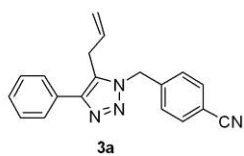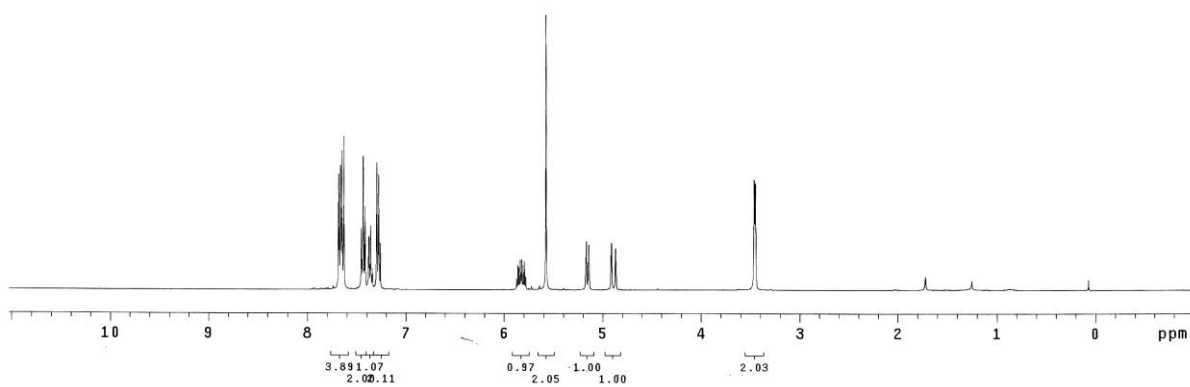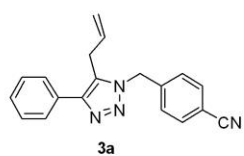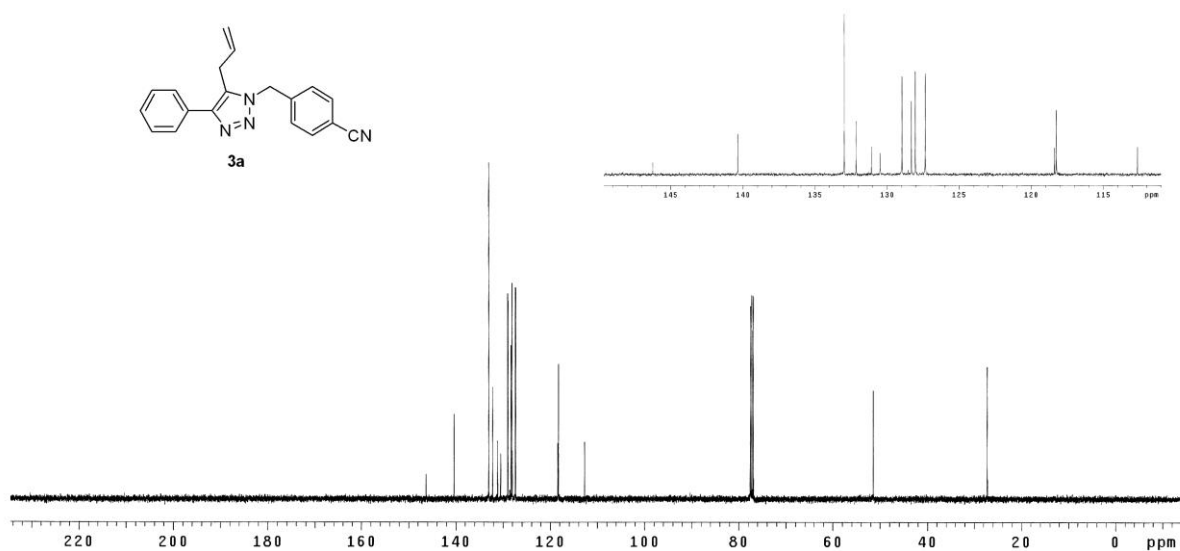

$^1\text{H-NMR}$  &  $^{13}\text{C-NMR}$  of **3b**

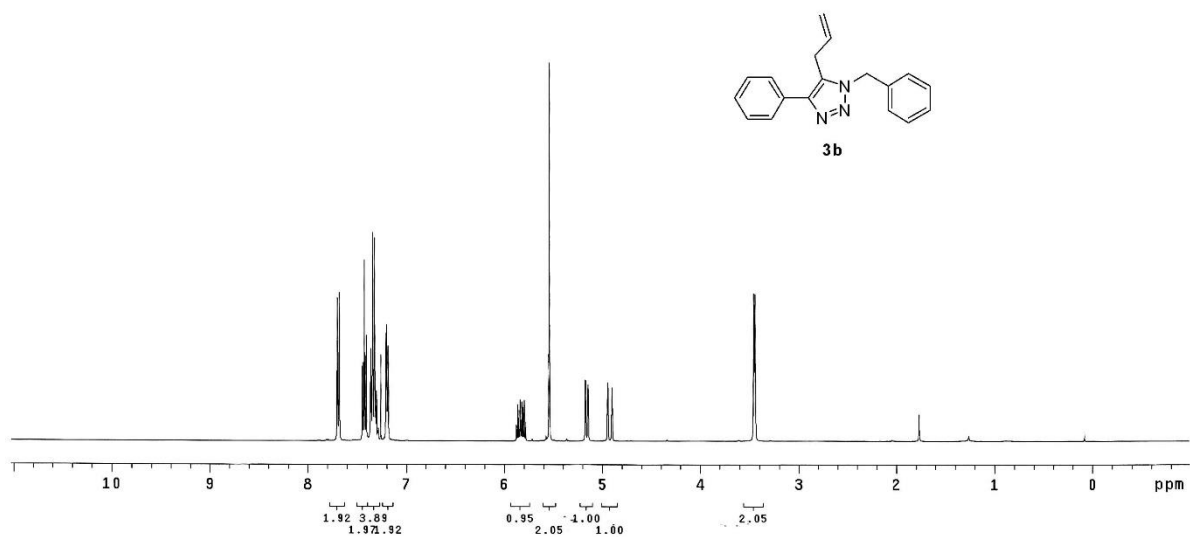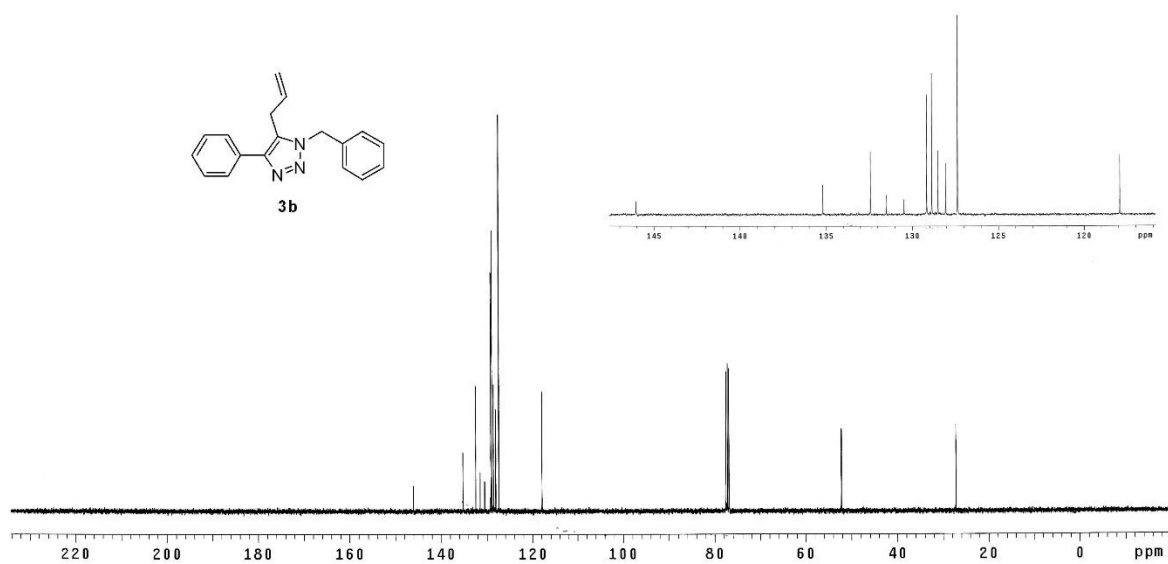

$^1\text{H-NMR}$  &  $^{13}\text{C-NMR}$  of **3c**

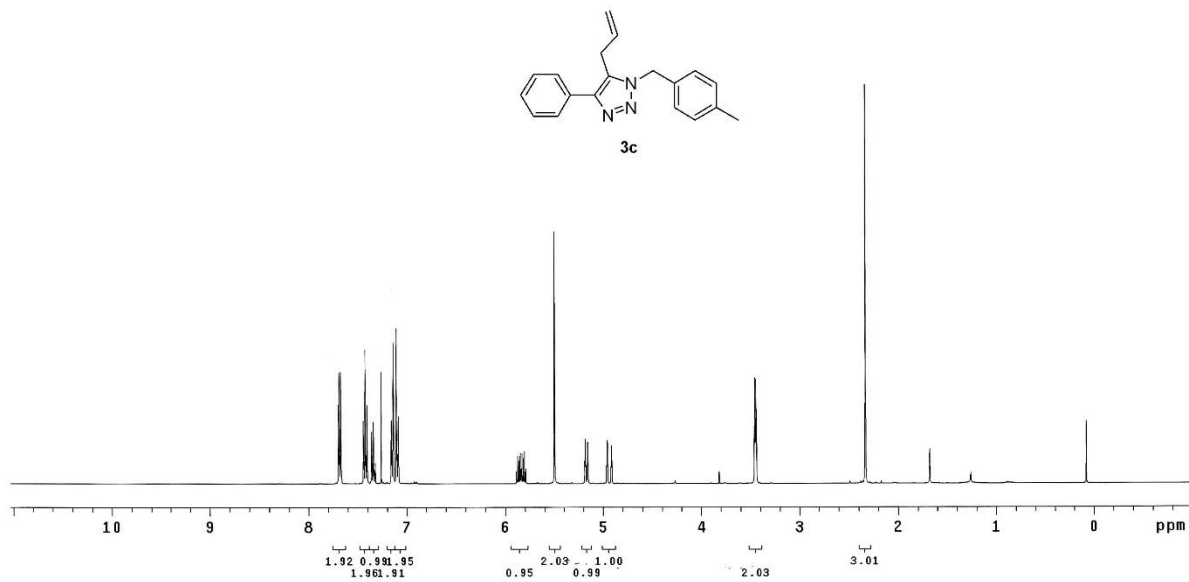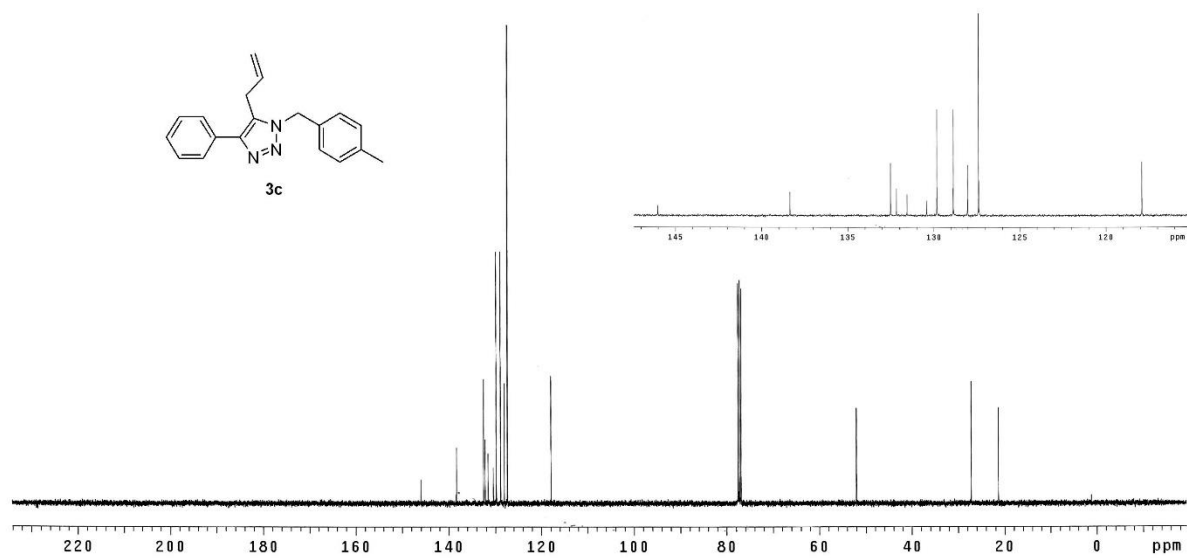

$^1\text{H-NMR}$  &  $^{13}\text{C-NMR}$  of **3d**

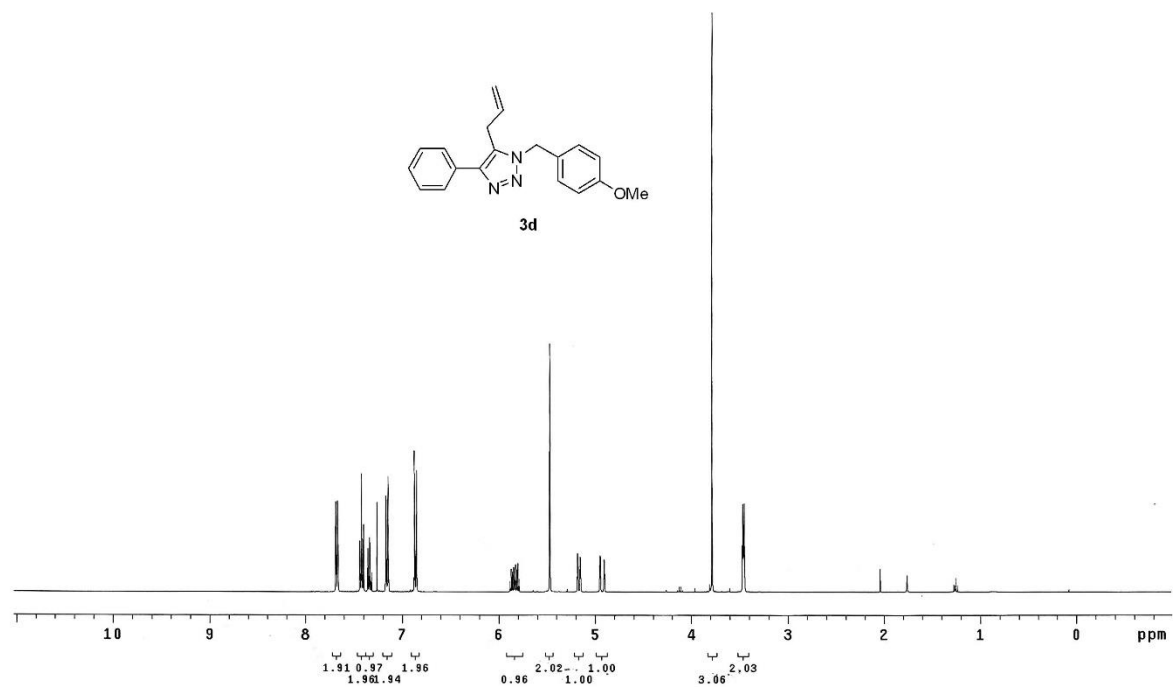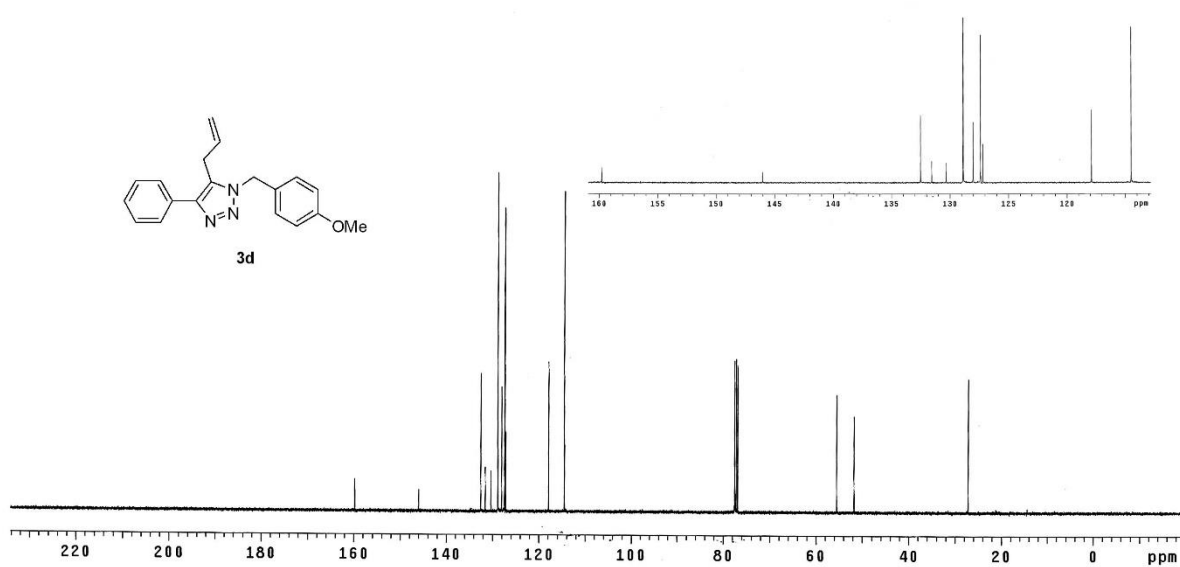

$^1\text{H-NMR}$  &  $^{13}\text{C-NMR}$  of **3e**

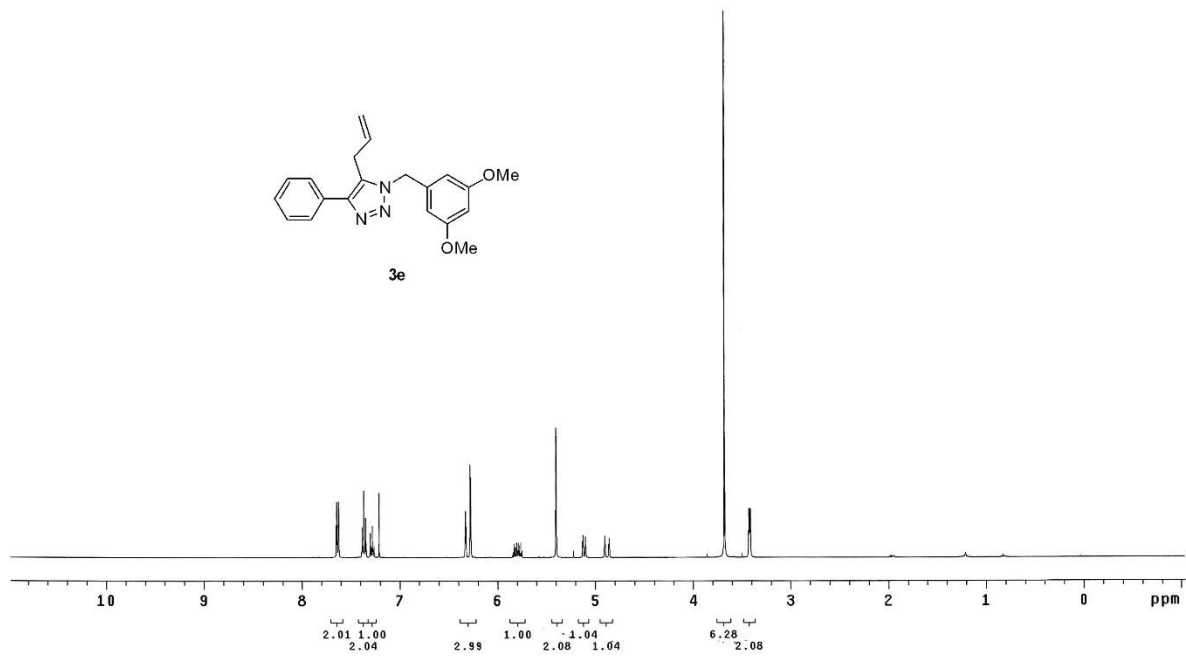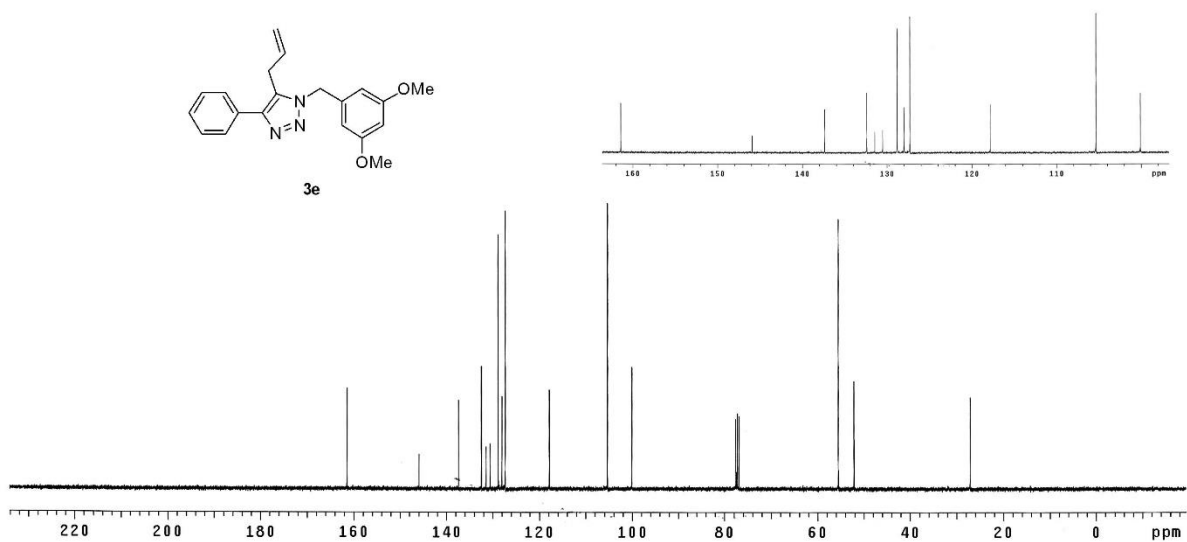

$^1\text{H-NMR}$  &  $^{13}\text{C-NMR}$  of **3f**

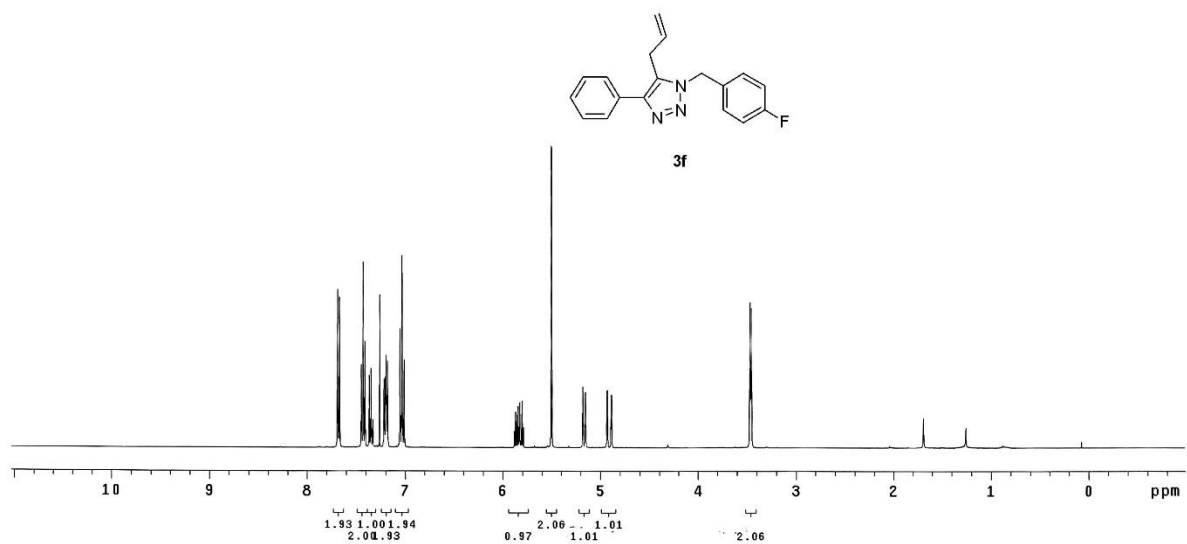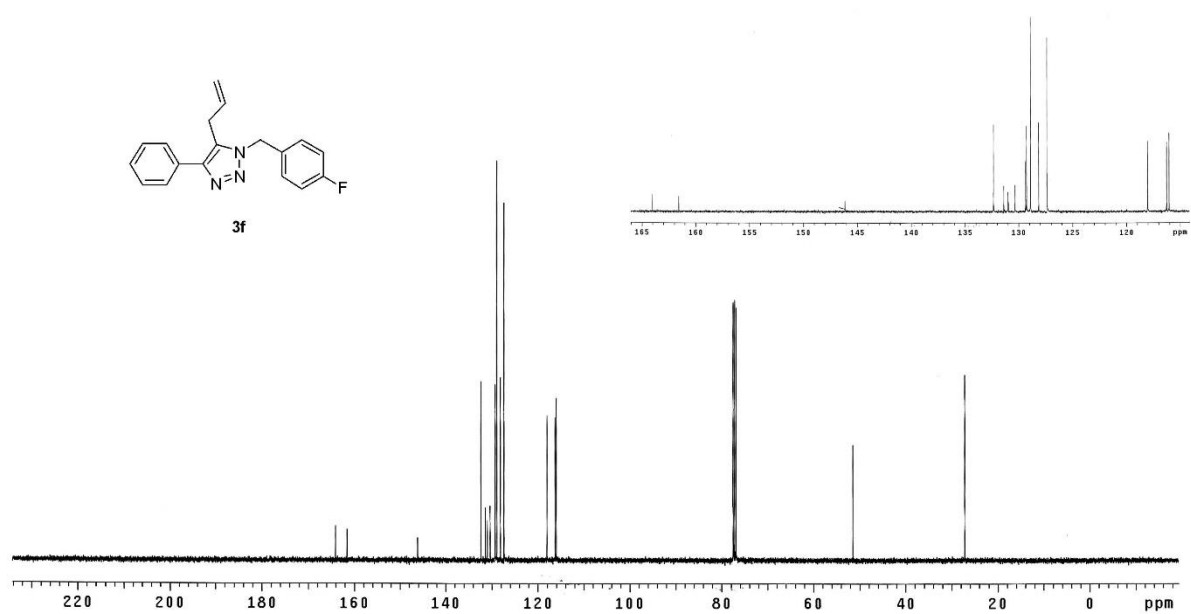

$^1\text{H-NMR}$  &  $^{13}\text{C-NMR}$  of **3g**

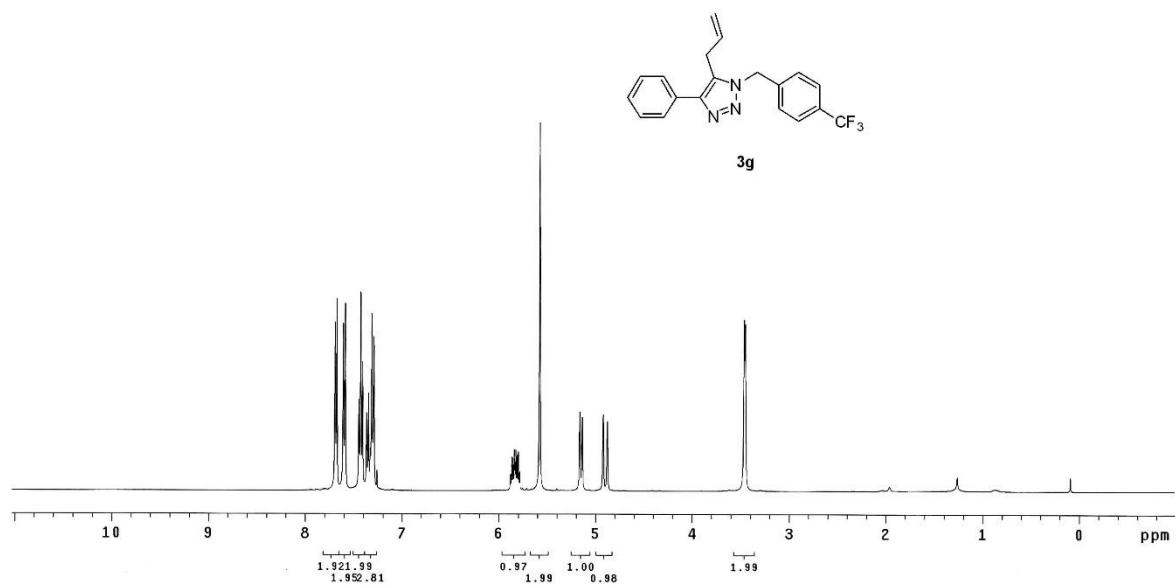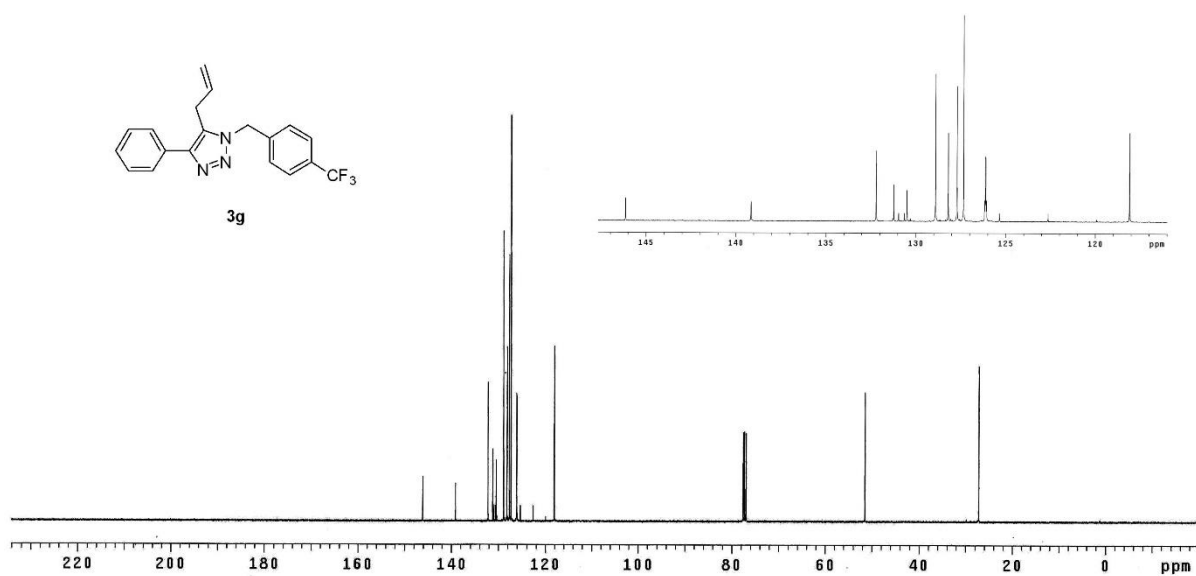



$^1\text{H-NMR}$  &  $^{13}\text{C-NMR}$  of **3h**

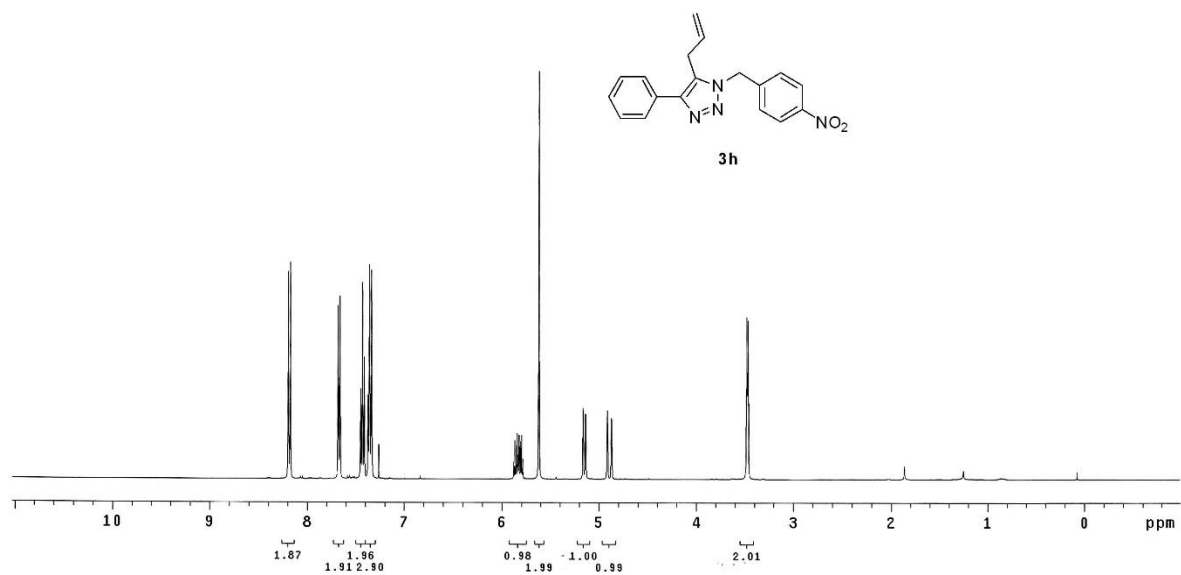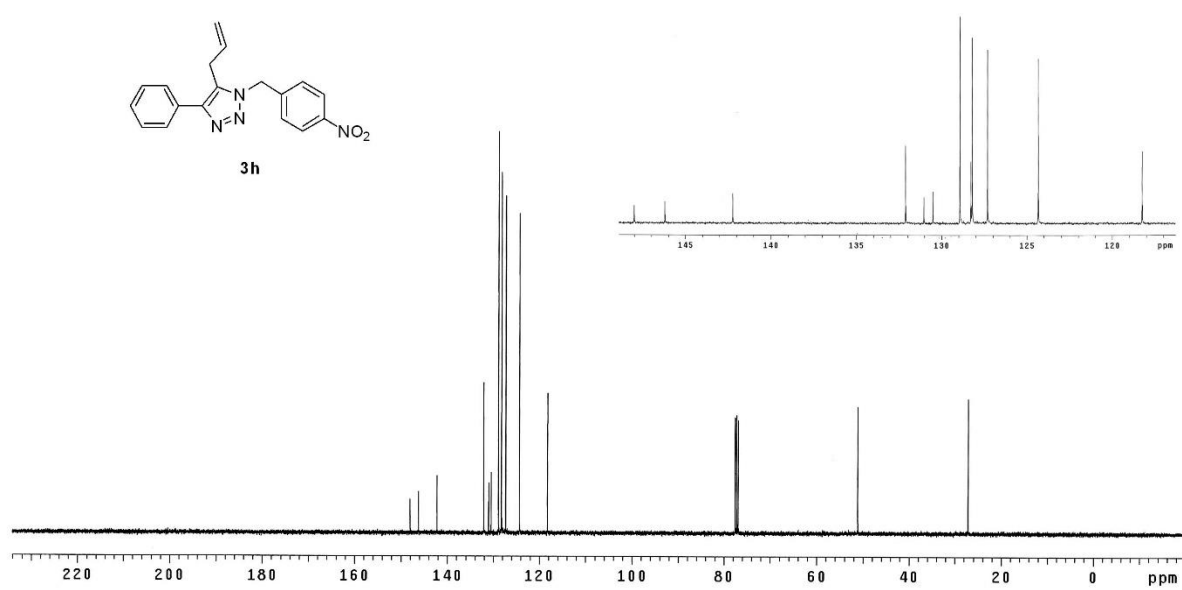

$^1\text{H-NMR}$  &  $^{13}\text{C-NMR}$  of **3i**

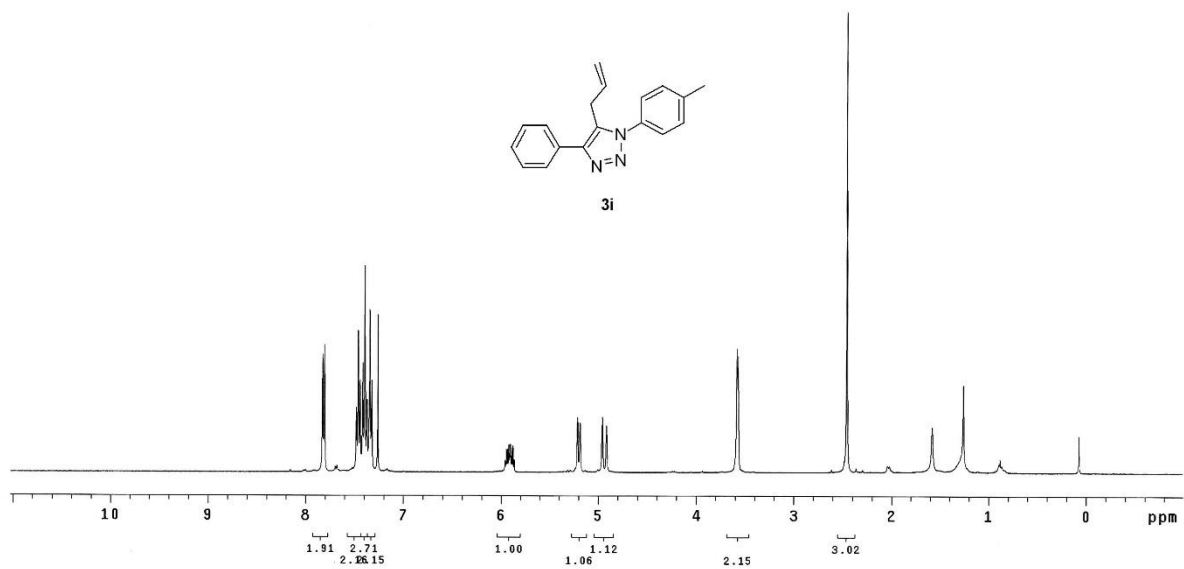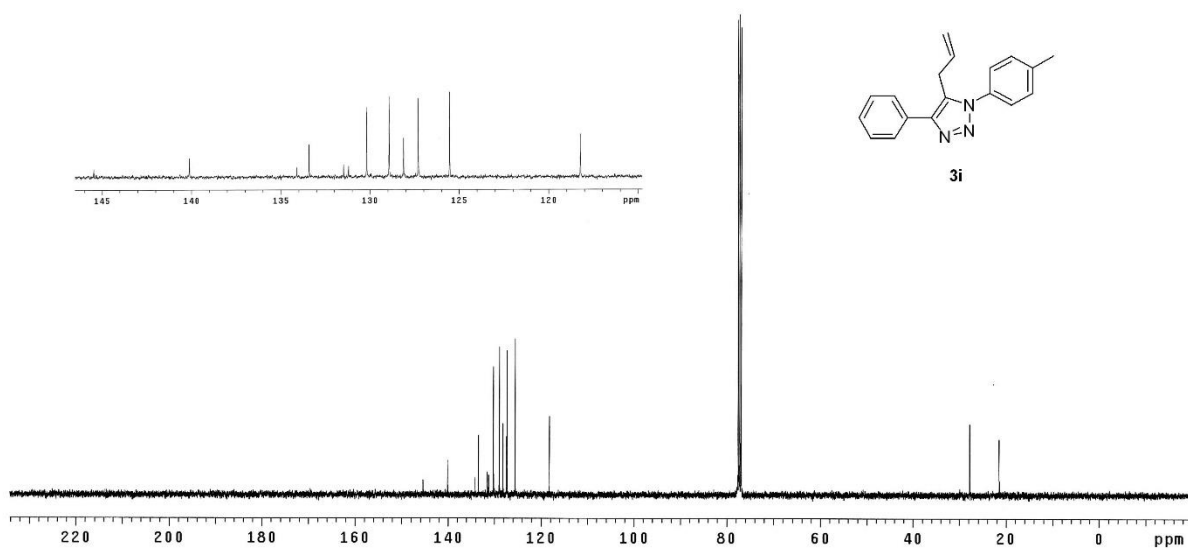

$^1\text{H-NMR}$  &  $^{13}\text{C-NMR}$  of **3j**

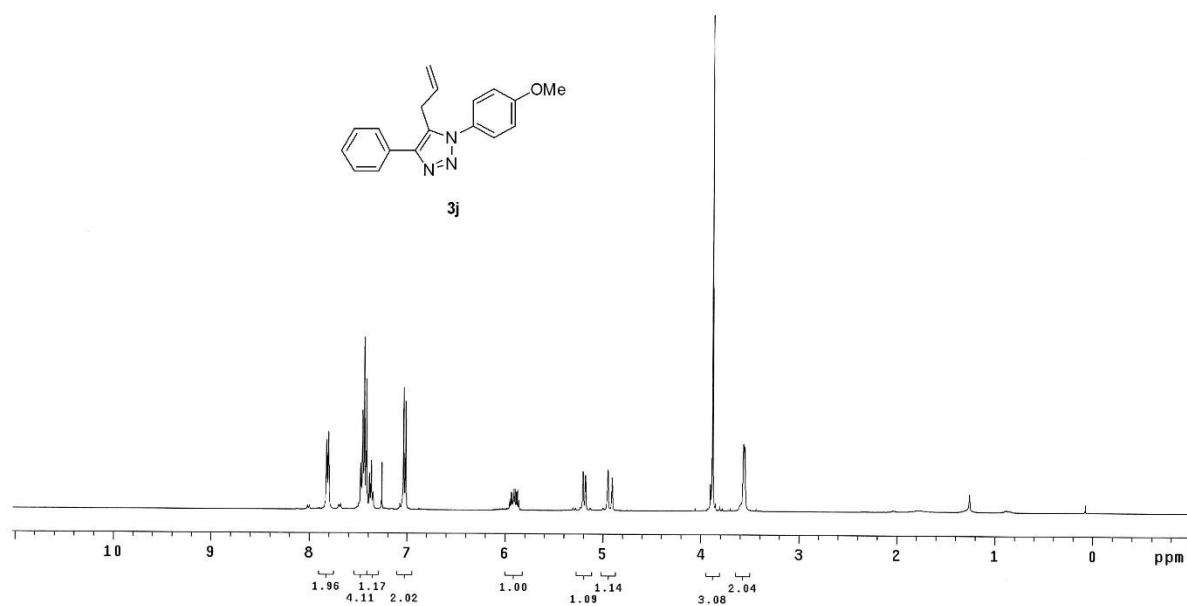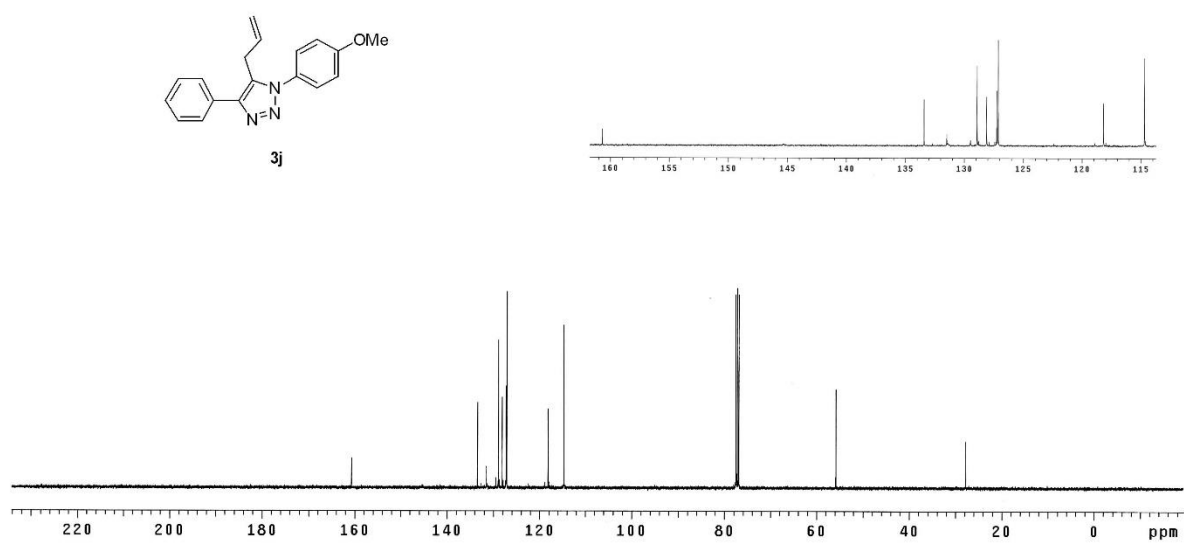

$^1\text{H-NMR}$  &  $^{13}\text{C-NMR}$  of **3k**

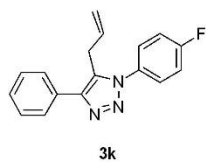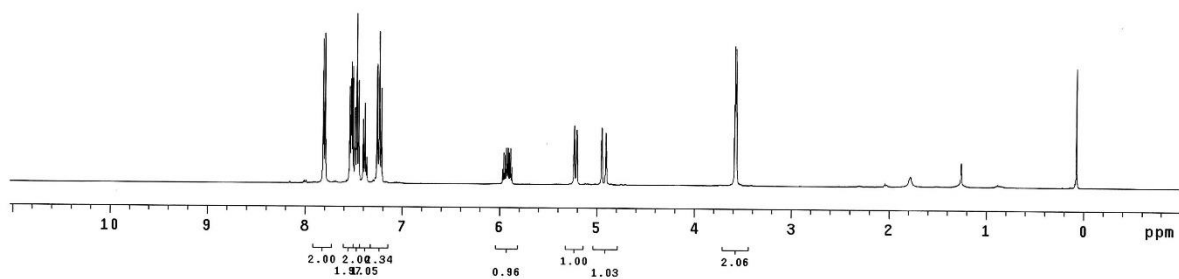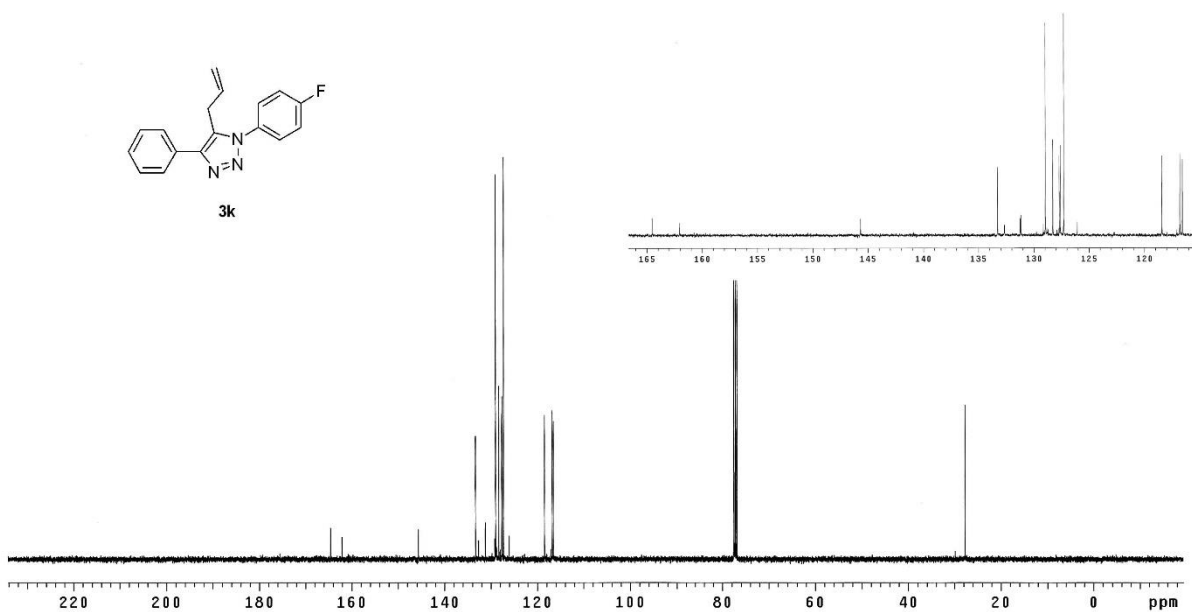

$^1\text{H-NMR}$  &  $^{13}\text{C-NMR}$  of **3I**

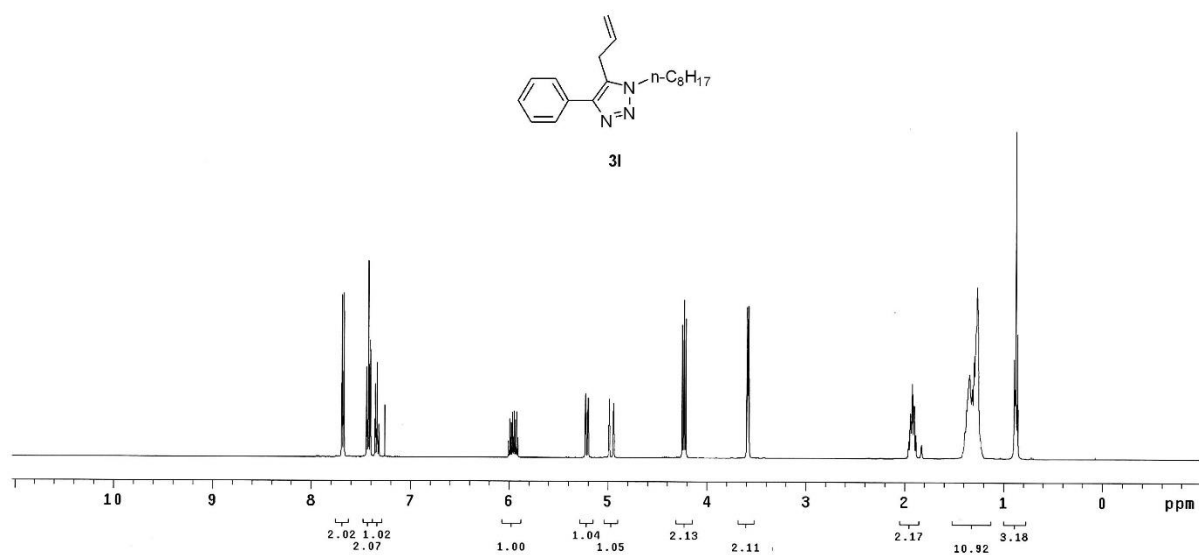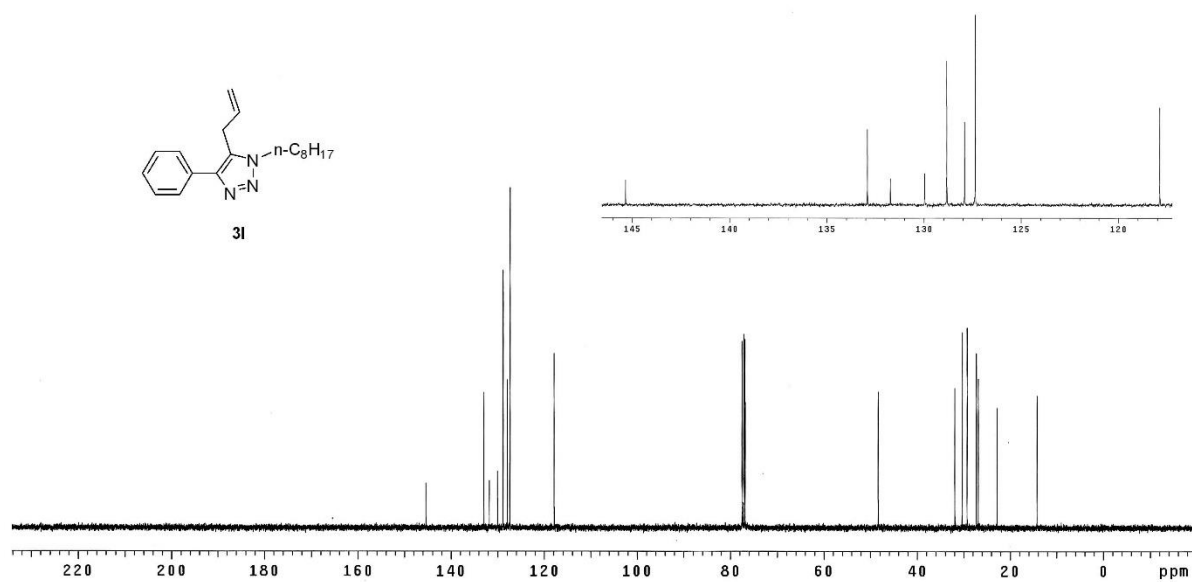

$^1\text{H-NMR}$  &  $^{13}\text{C-NMR}$  of **3m**

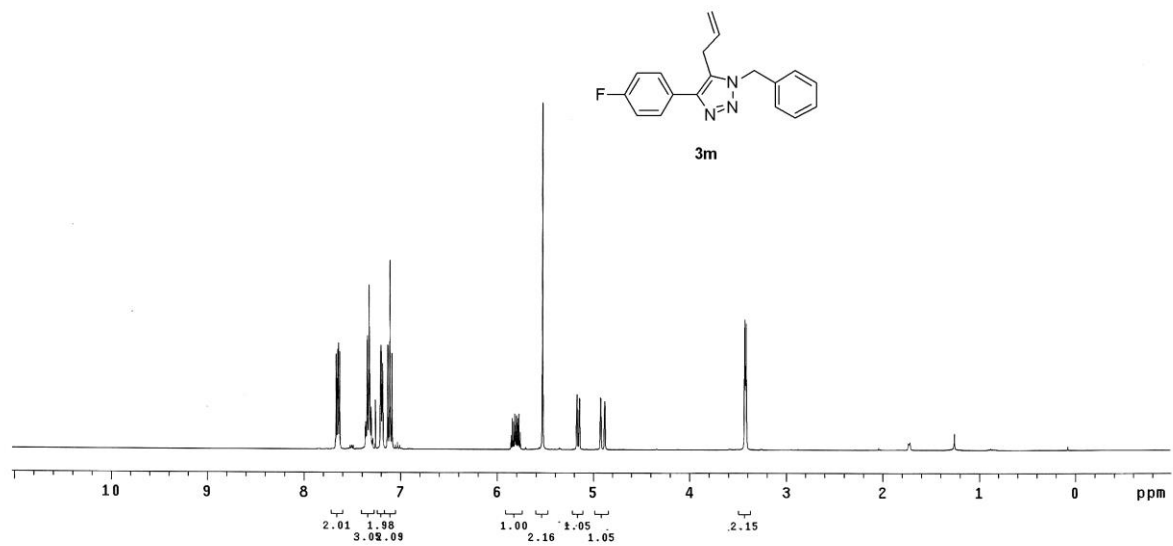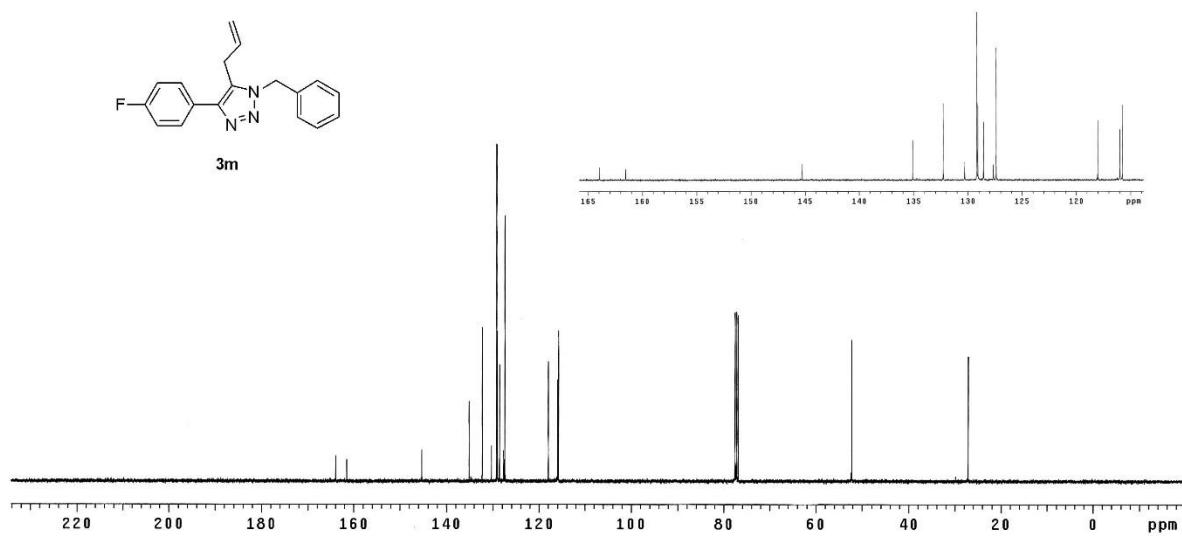

$^1\text{H-NMR}$  &  $^{13}\text{C-NMR}$  of **3n**

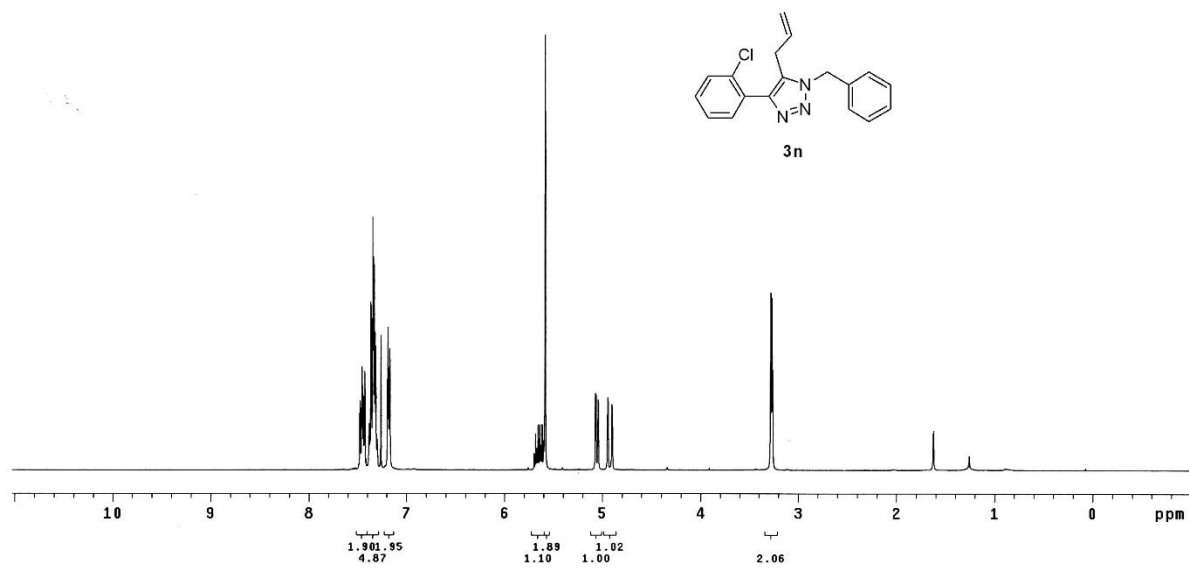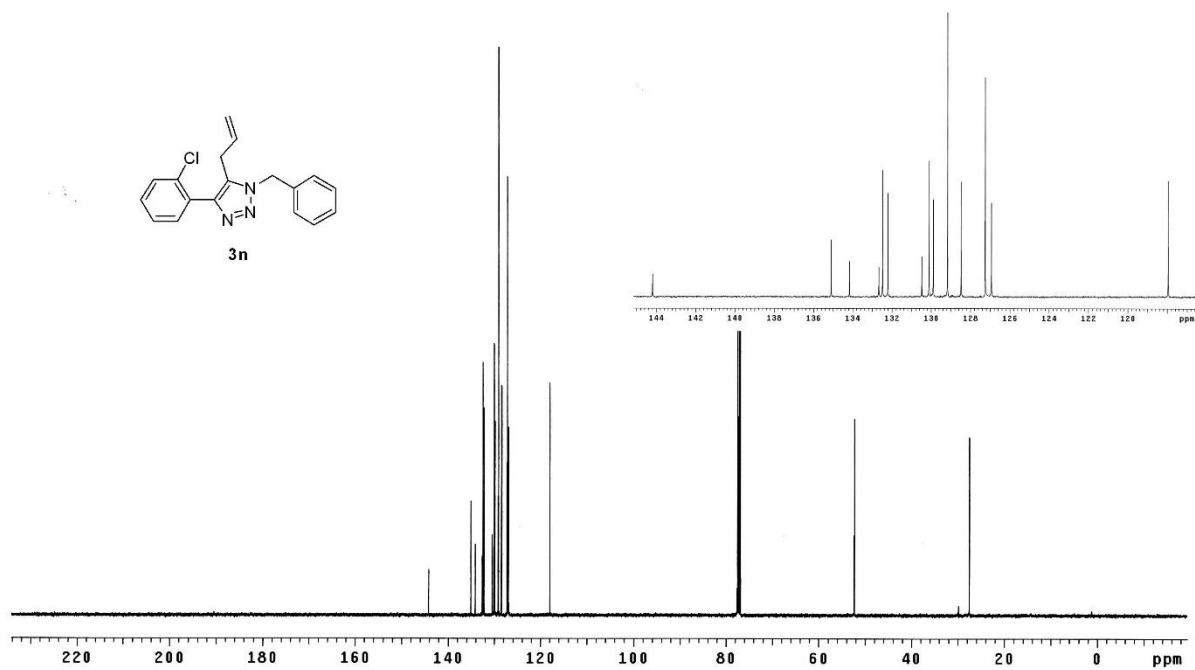

$^1\text{H-NMR}$  &  $^{13}\text{C-NMR}$  of **3o**

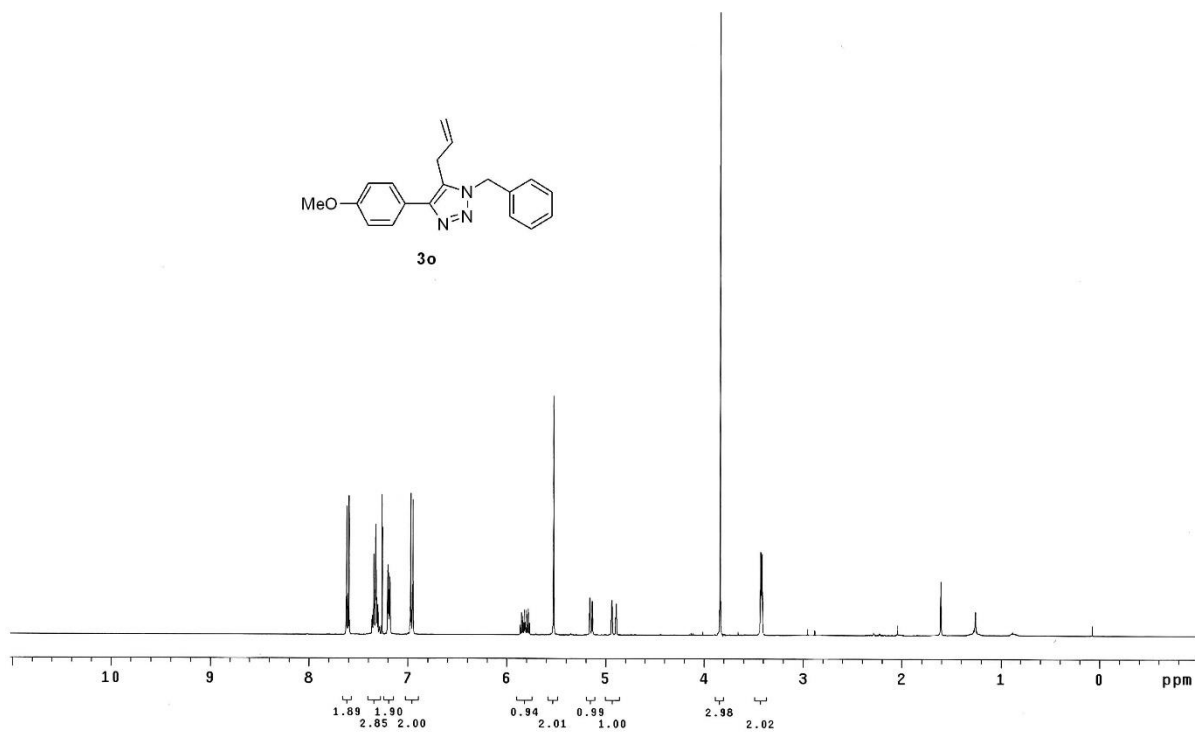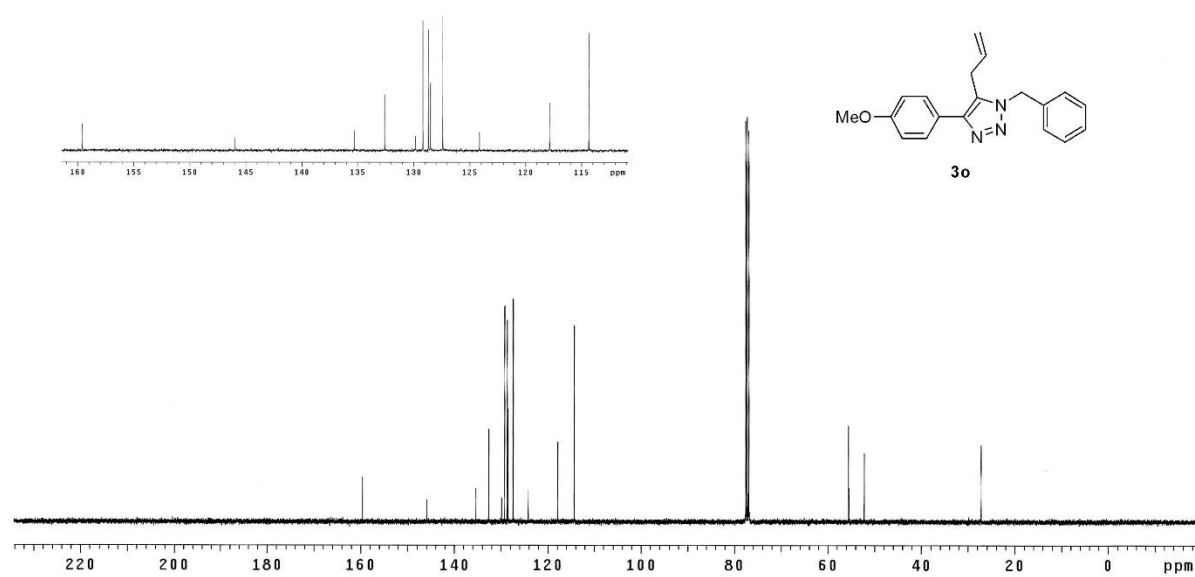



$^1\text{H-NMR}$  &  $^{13}\text{C-NMR}$  of **3p**

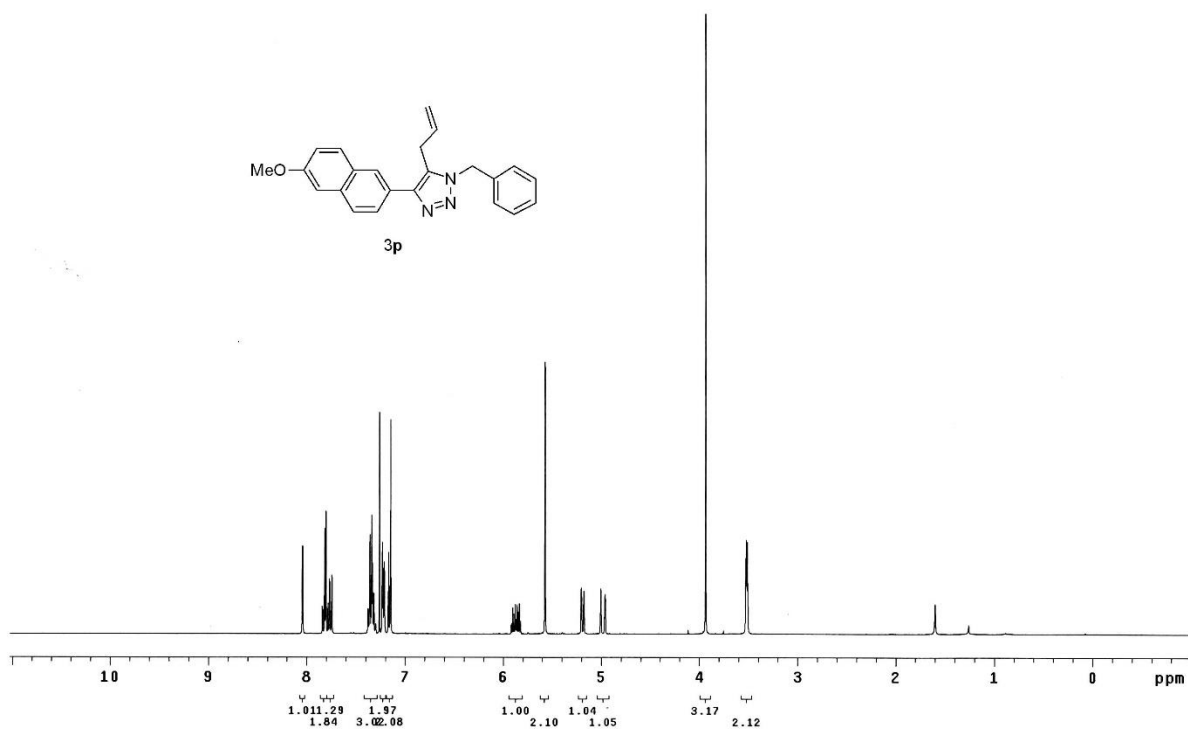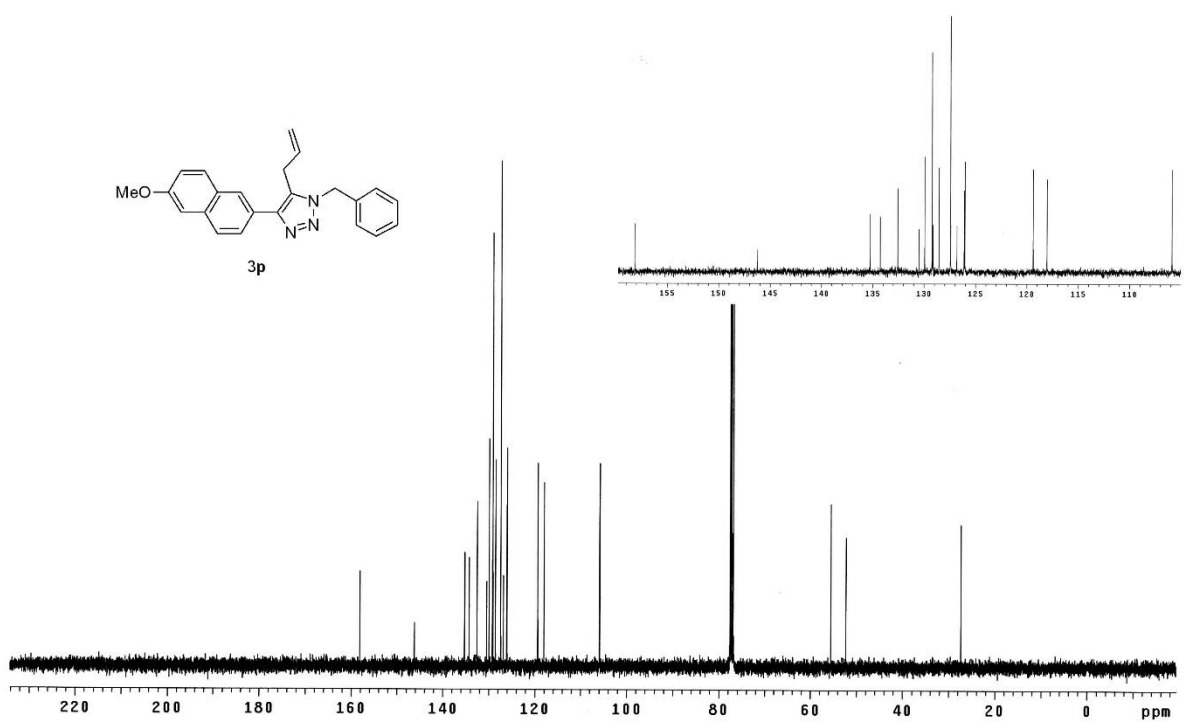

$^1\text{H-NMR}$  &  $^{13}\text{C-NMR}$  of **3q**

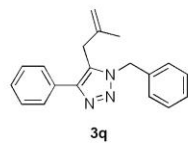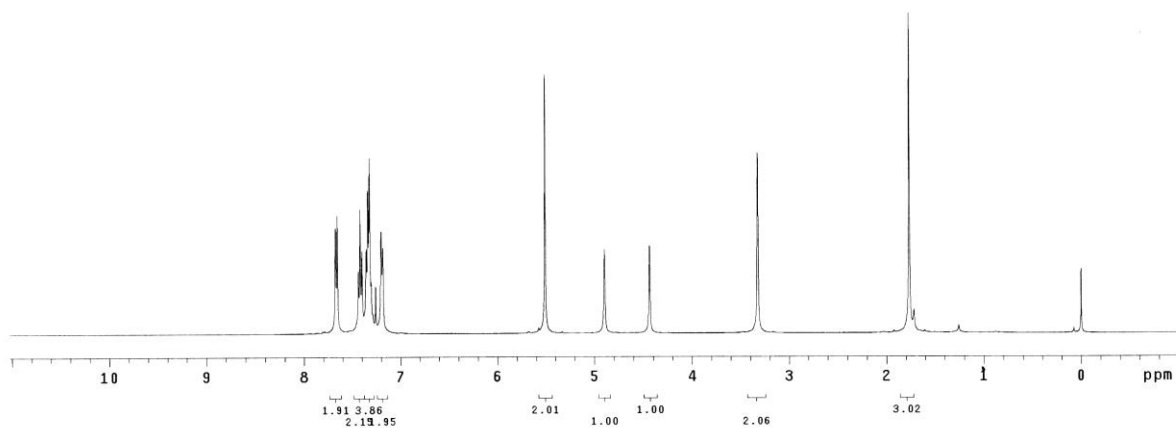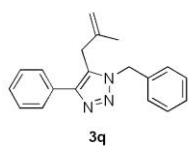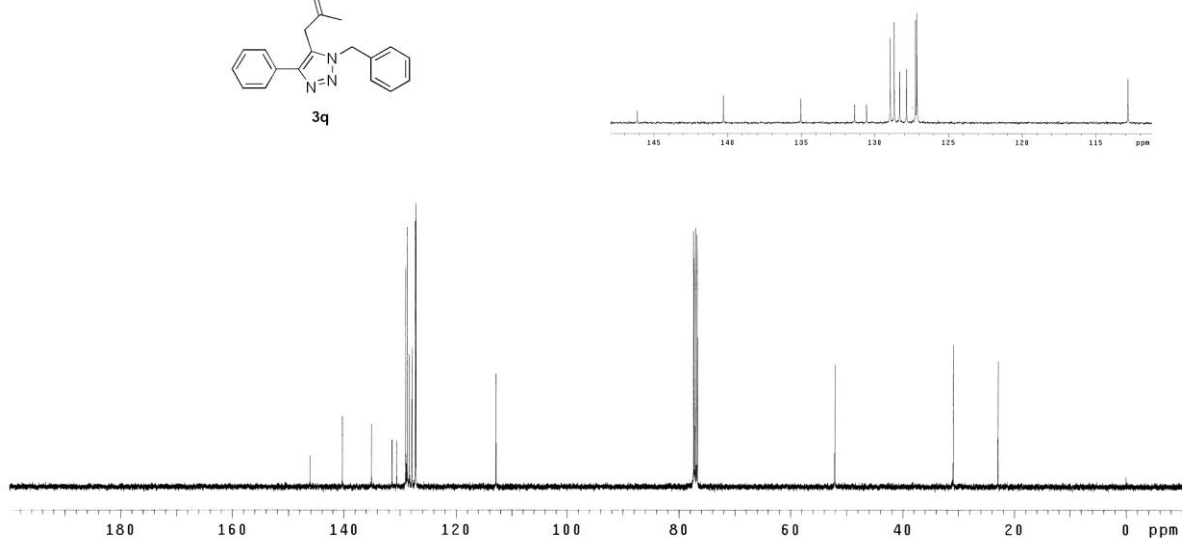

$^1\text{H-NMR}$  &  $^{13}\text{C-NMR}$  of **3r**

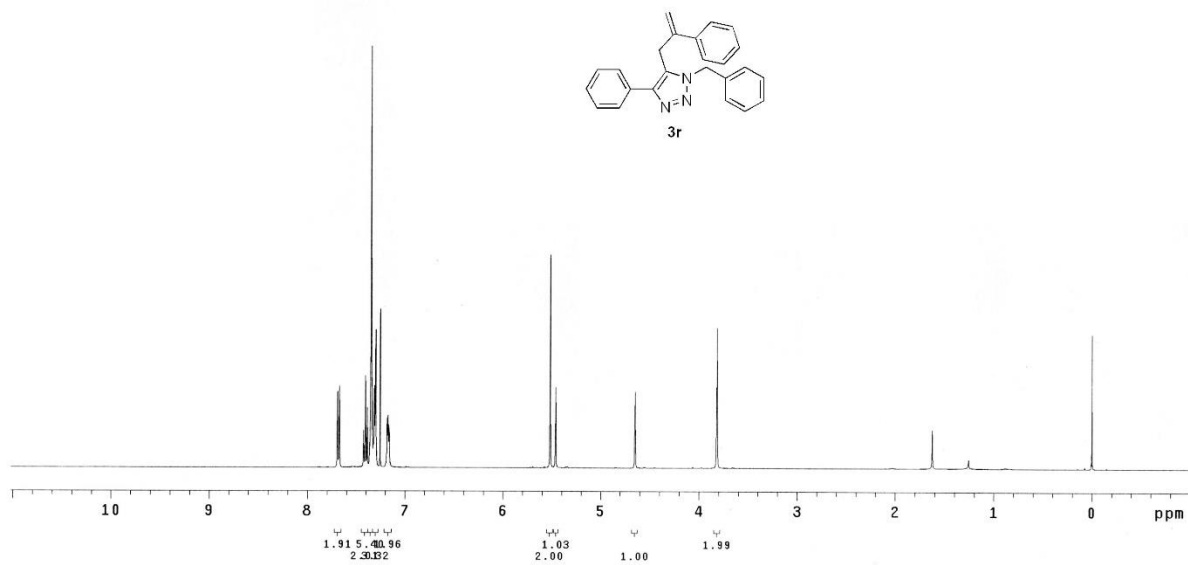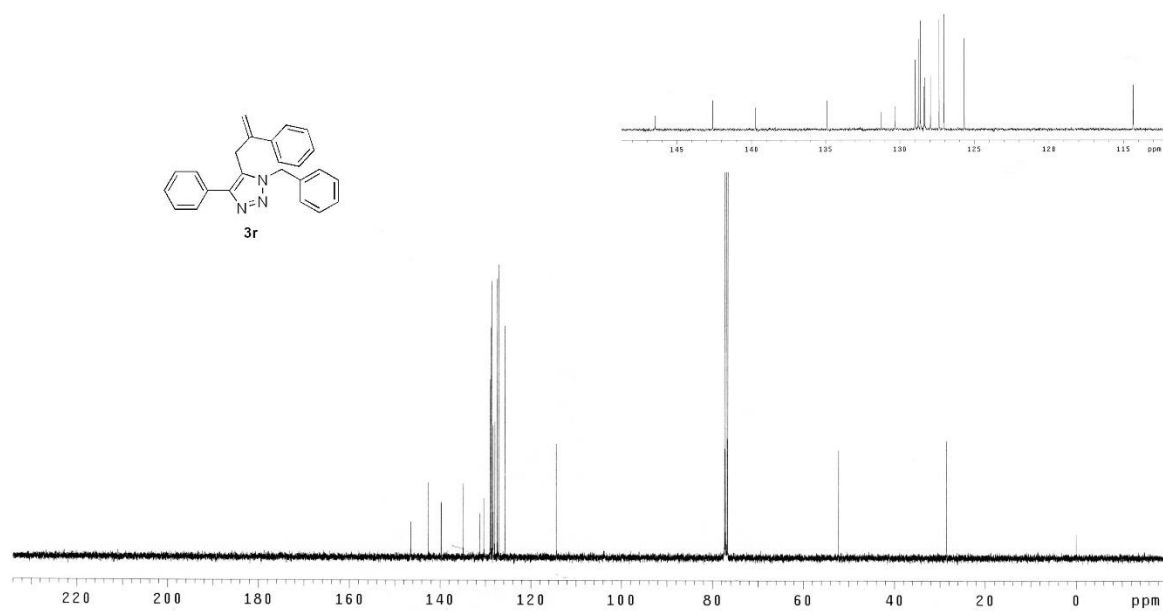

$^1\text{H-NMR}$  &  $^{13}\text{C-NMR}$  of **3s**

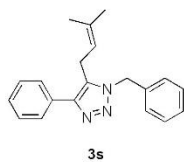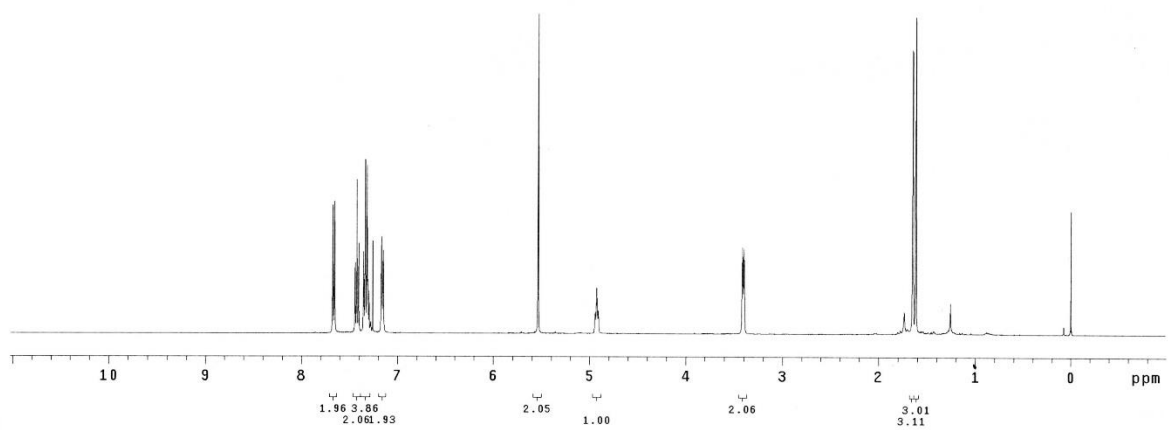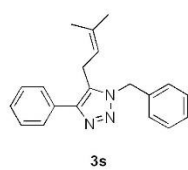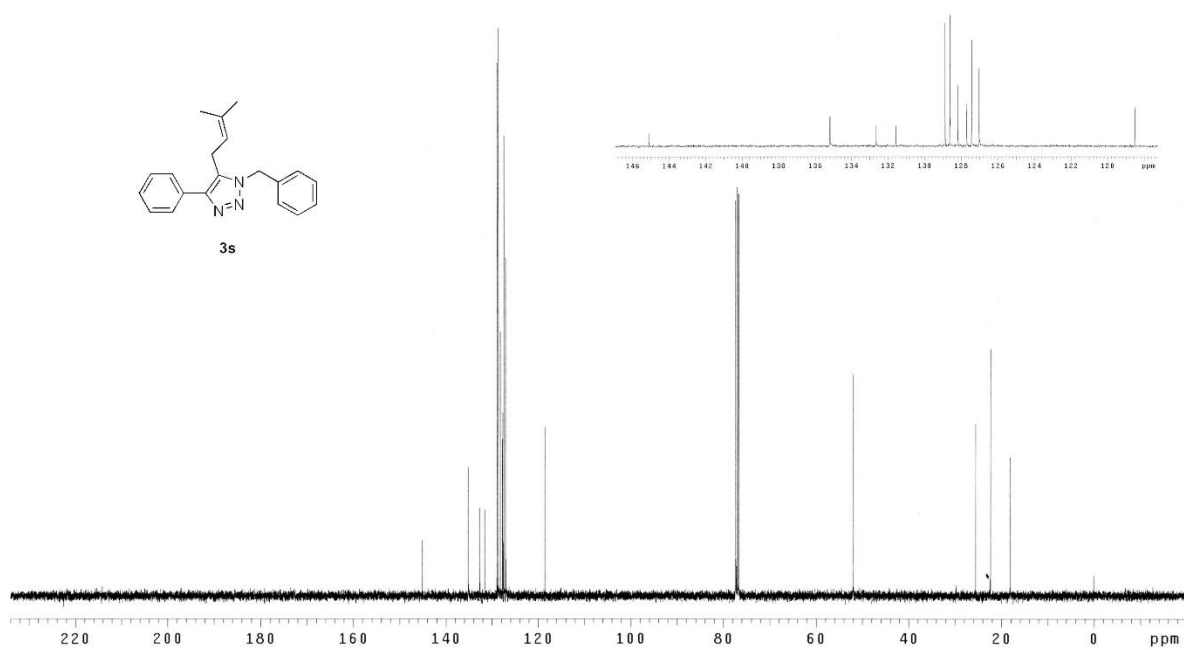

# $^1\text{H-NMR}$ & $^{13}\text{C-NMR}$ of **3t**

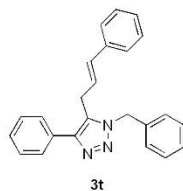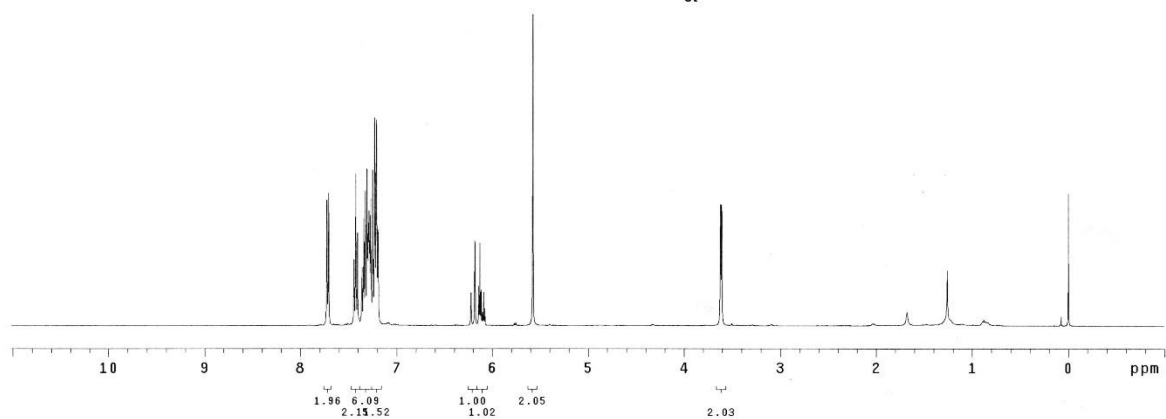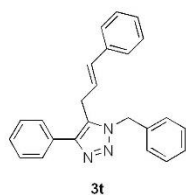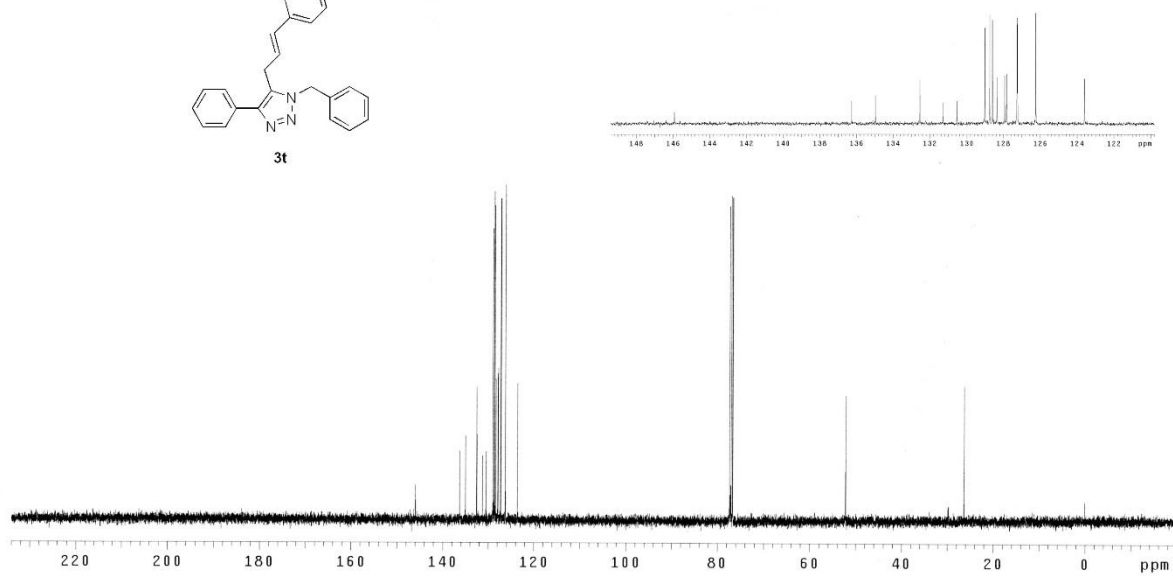

$^1\text{H-NMR}$  &  $^{13}\text{C-NMR}$  of **3u**

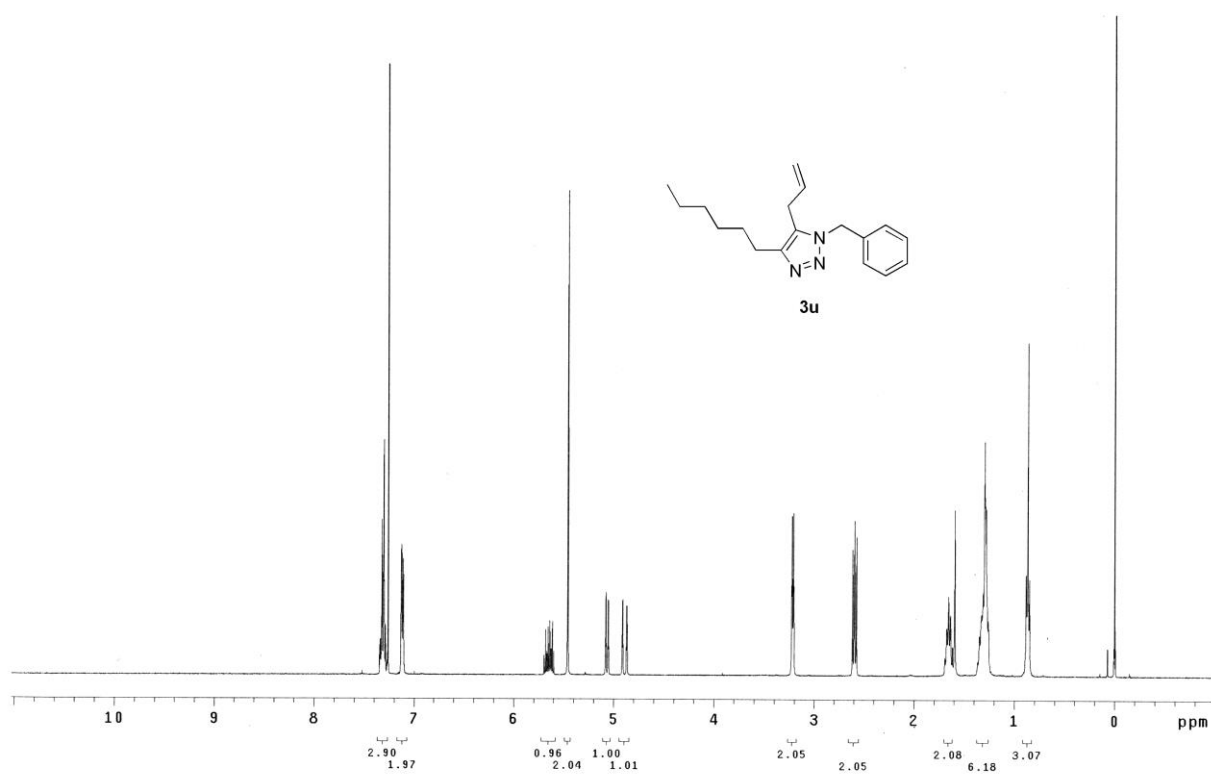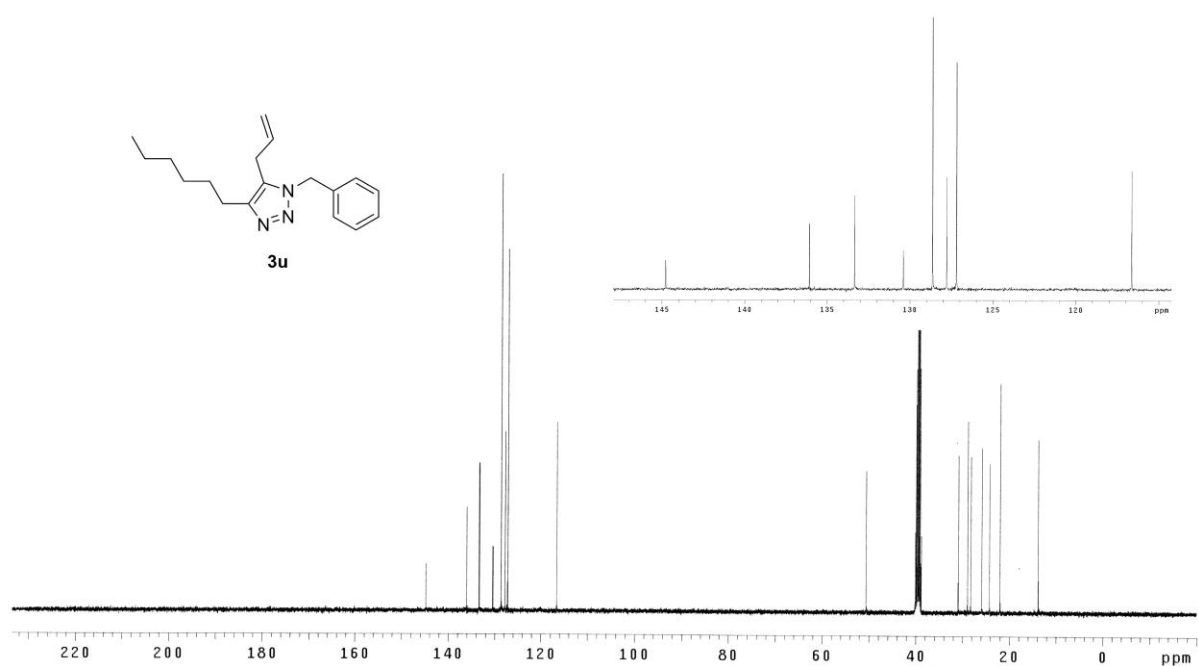

$^1\text{H-NMR}$  &  $^{13}\text{C-NMR}$  of **3v**

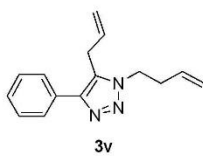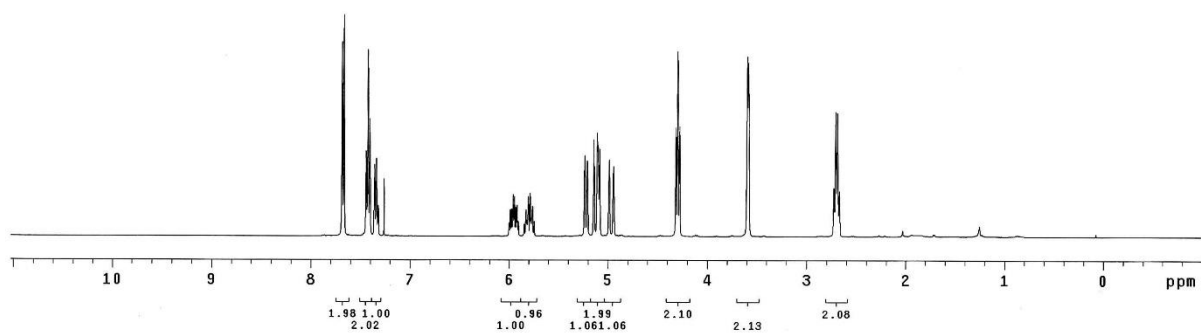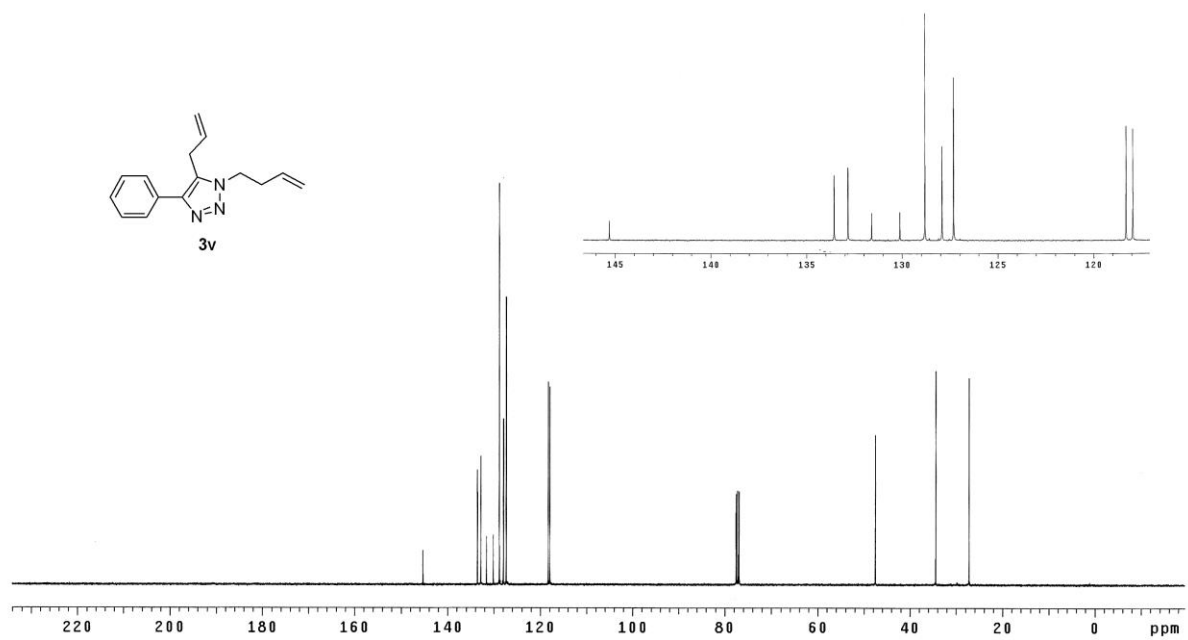

$^1\text{H-NMR}$  &  $^{13}\text{C-NMR}$  of **3w**

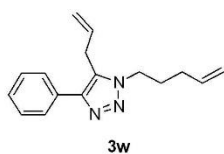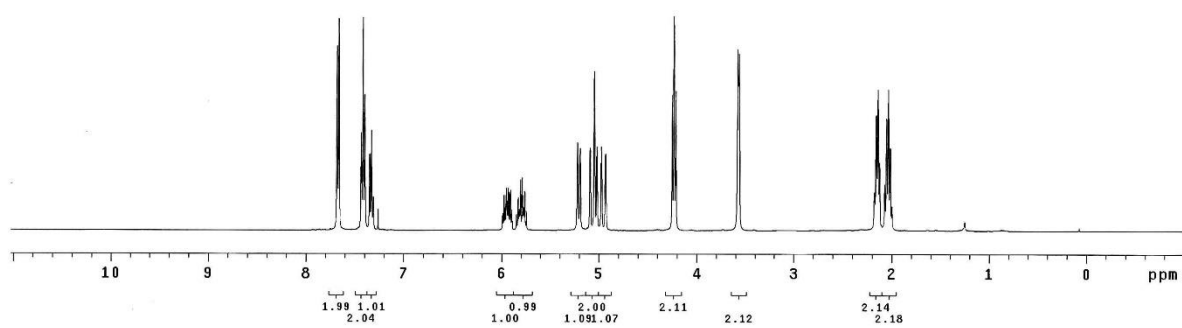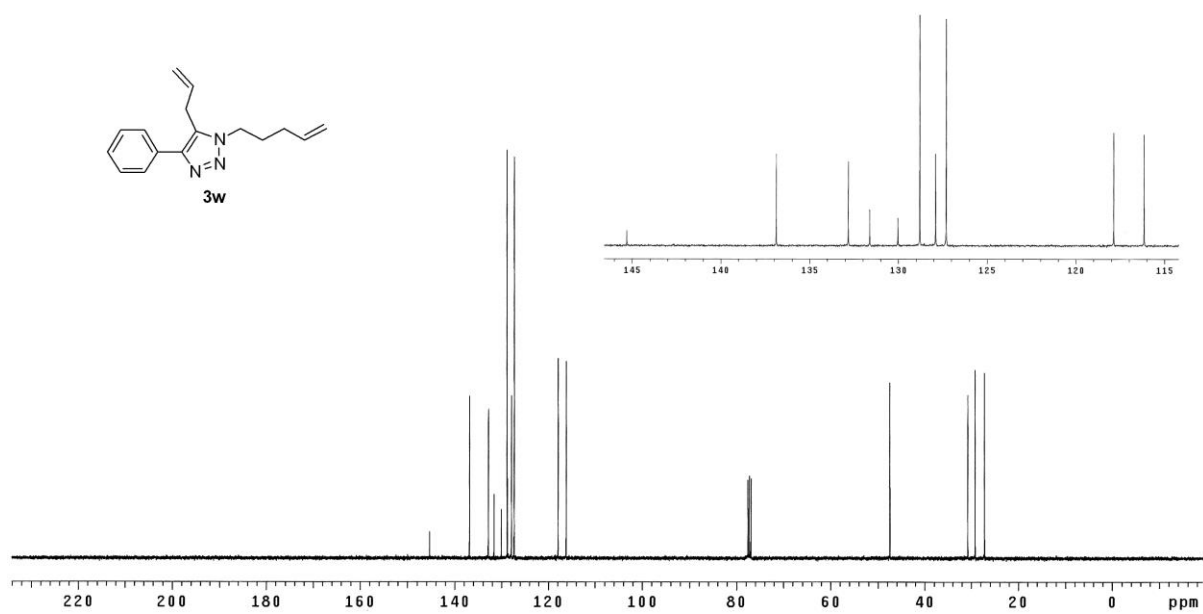



$^1\text{H-NMR}$  &  $^{13}\text{C-NMR}$  of **3x**

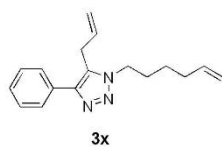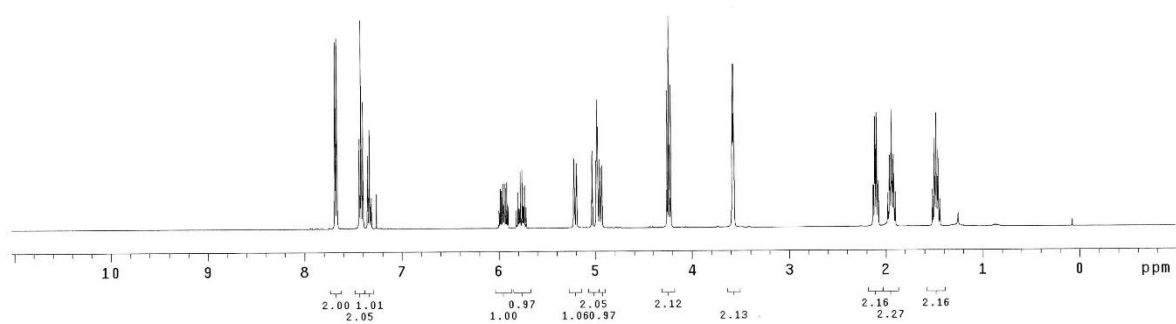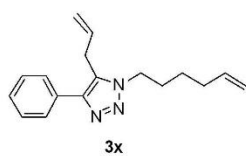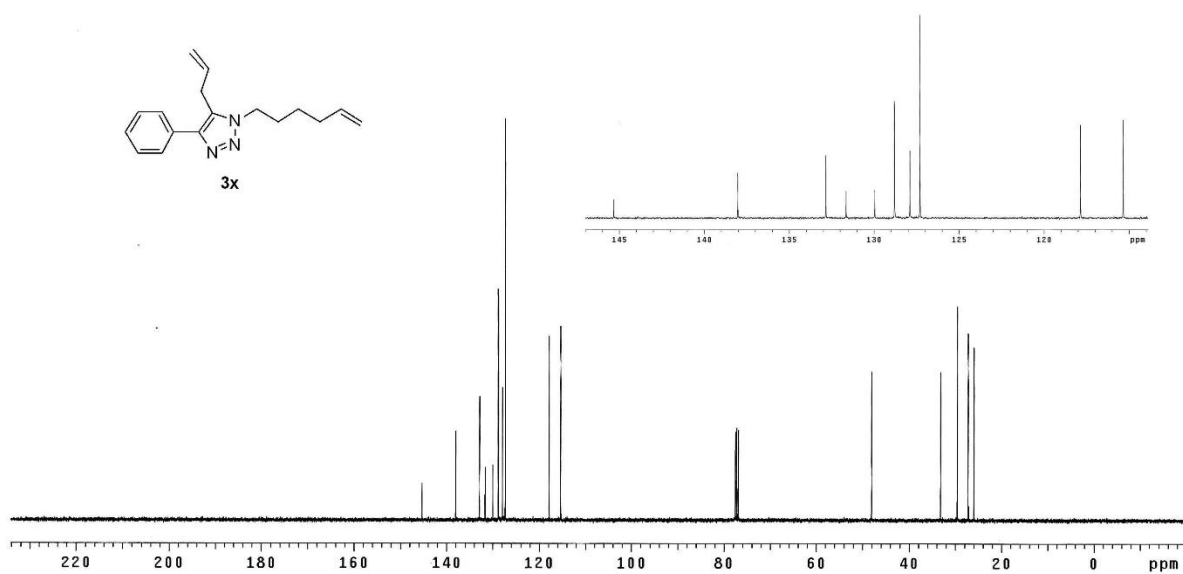

$^1\text{H-NMR}$  &  $^{13}\text{C-NMR}$  of **3y**

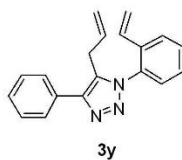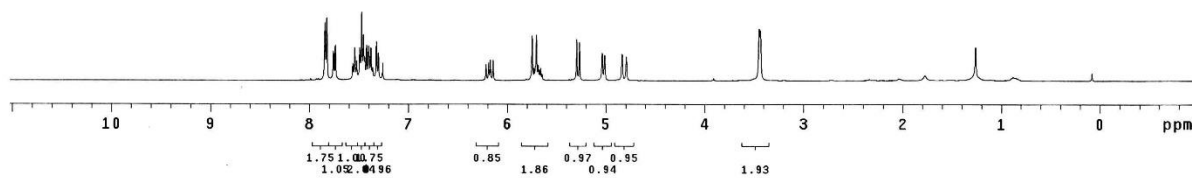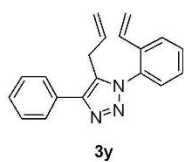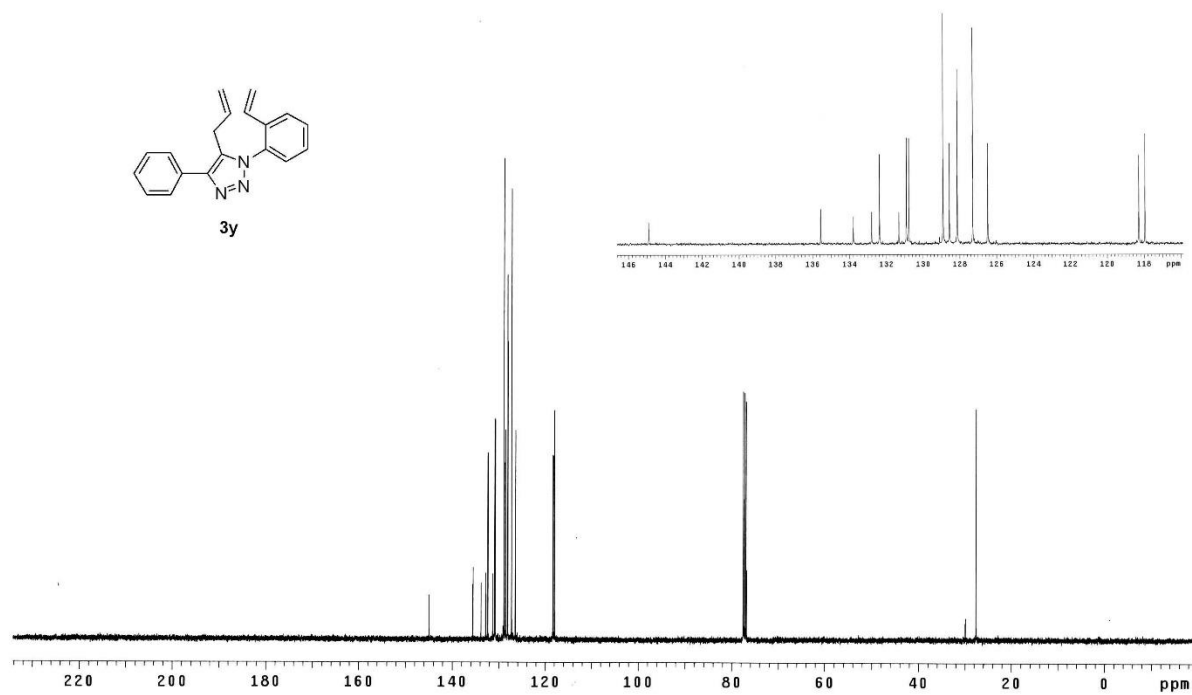

$^1\text{H-NMR}$  &  $^{13}\text{C-NMR}$  of **3z**

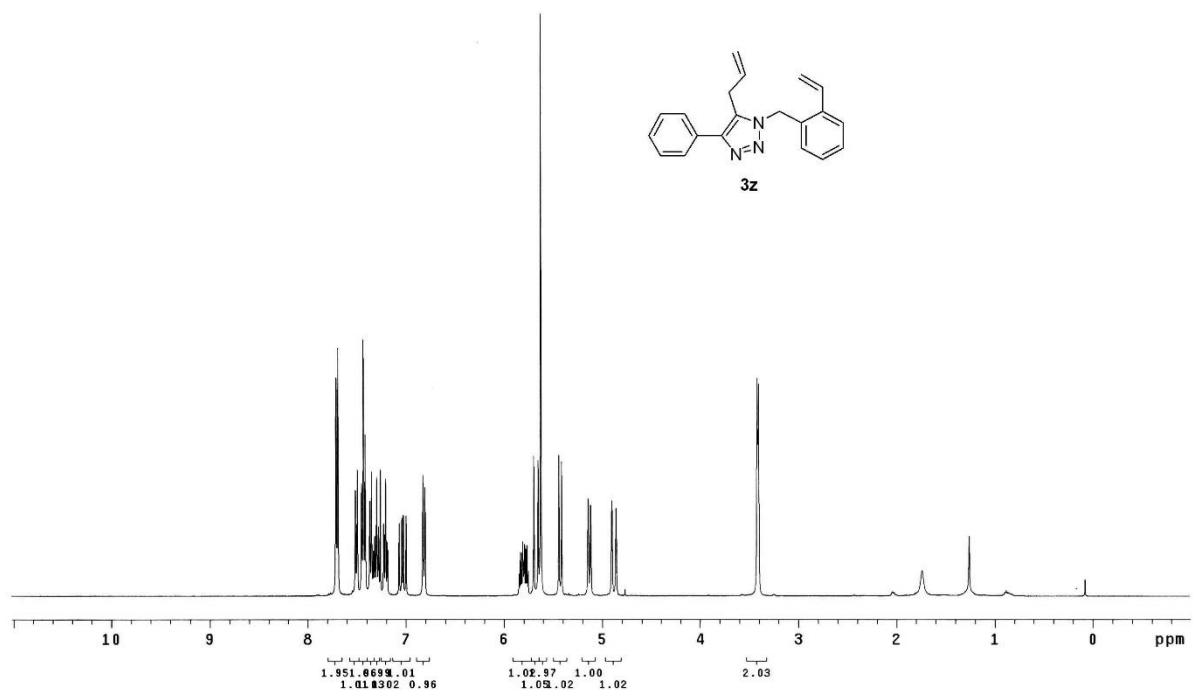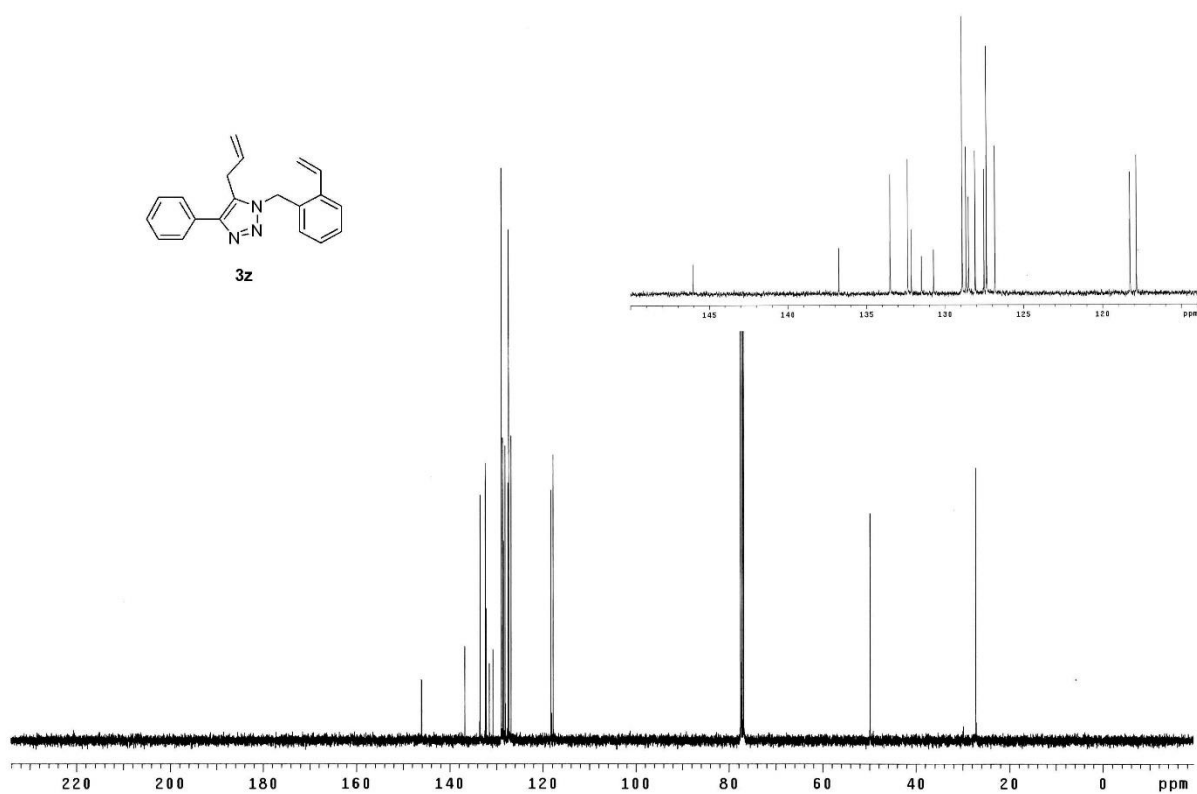

$^1\text{H-NMR}$  &  $^{13}\text{C-NMR}$  of **6v**

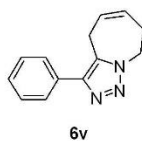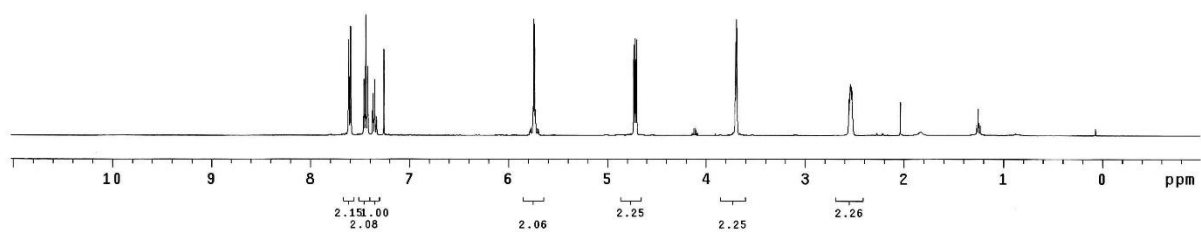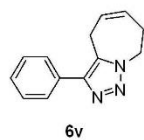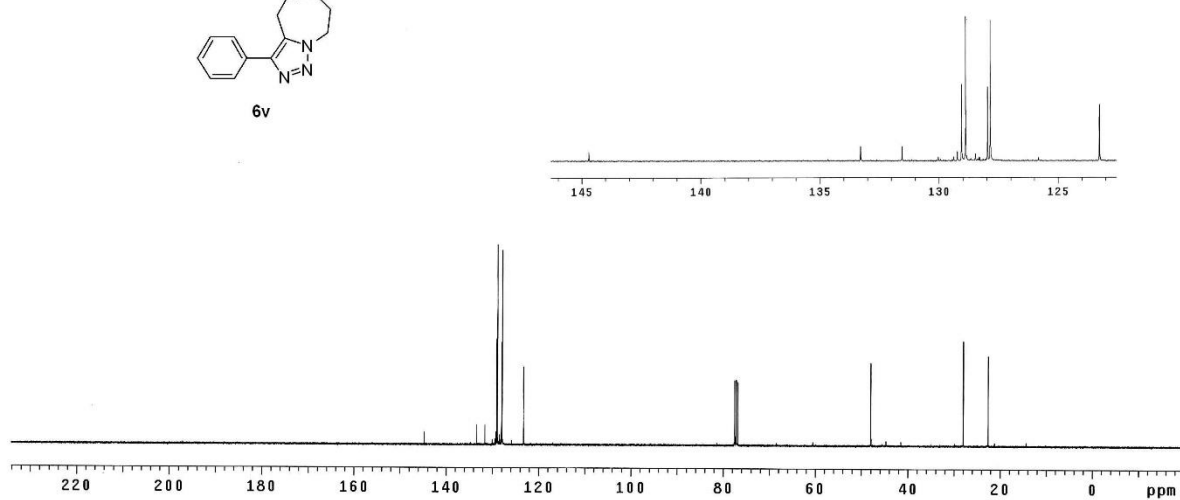

$^1\text{H-NMR}$  &  $^{13}\text{C-NMR}$  of **6w**

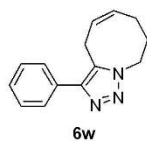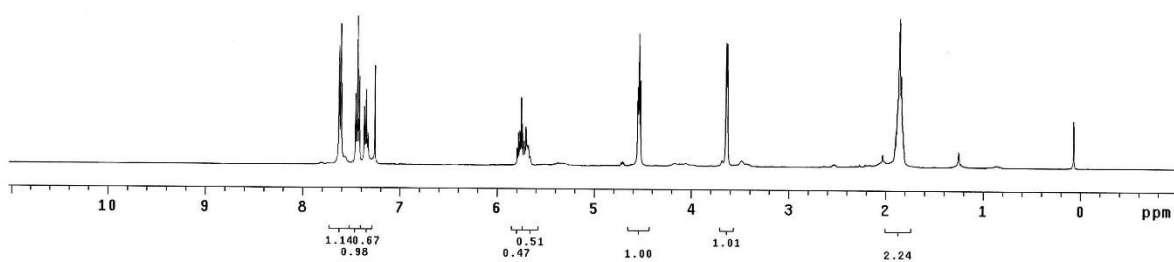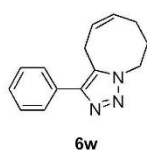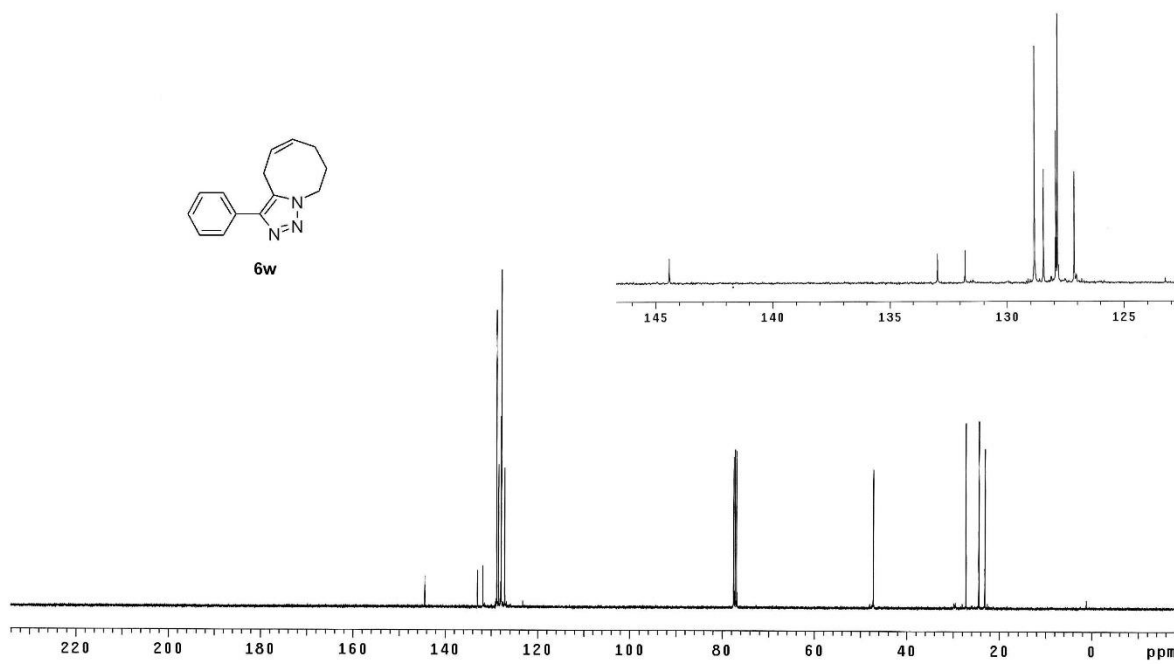

$^1\text{H-NMR}$  &  $^{13}\text{C-NMR}$  of **6x**

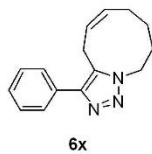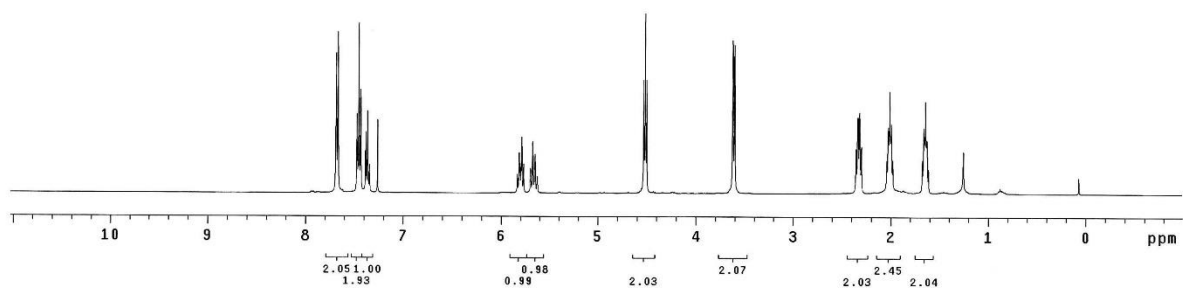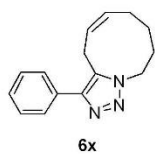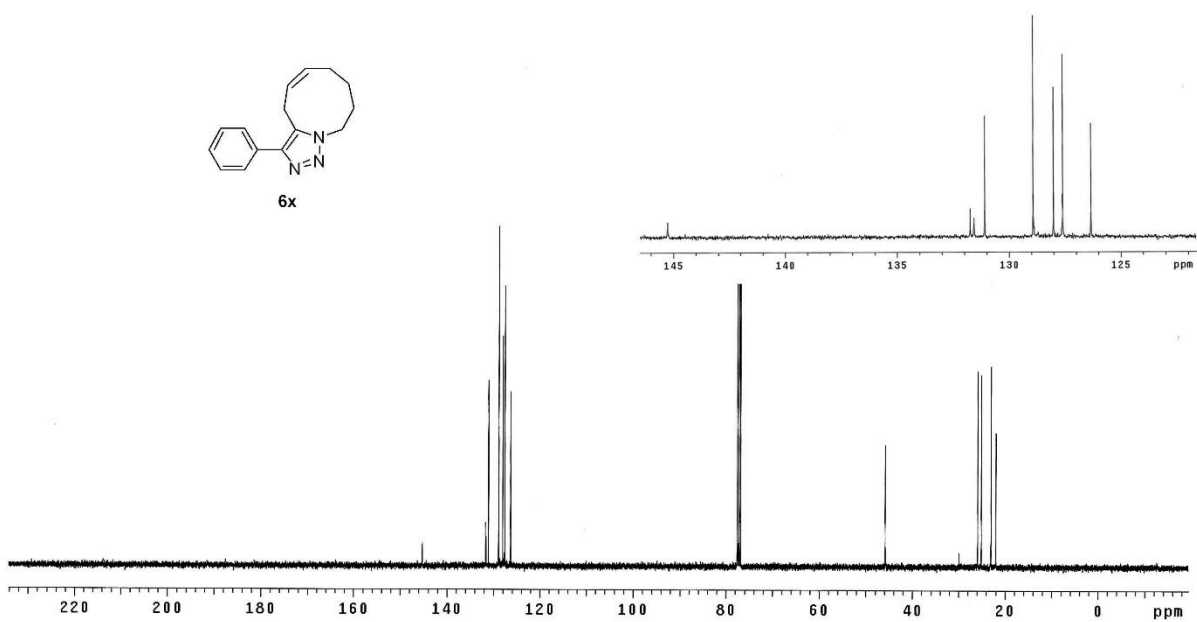

$^1\text{H-NMR}$  &  $^{13}\text{C-NMR}$  of **6y**

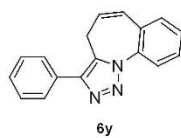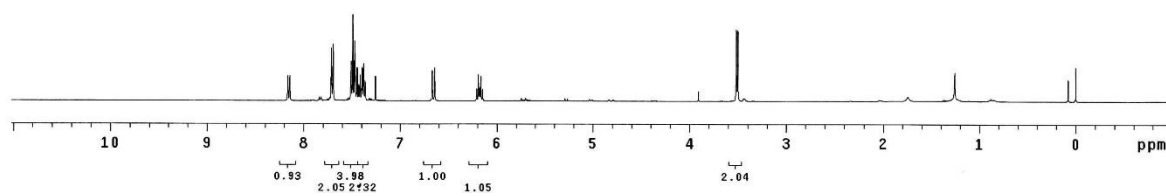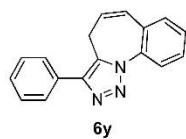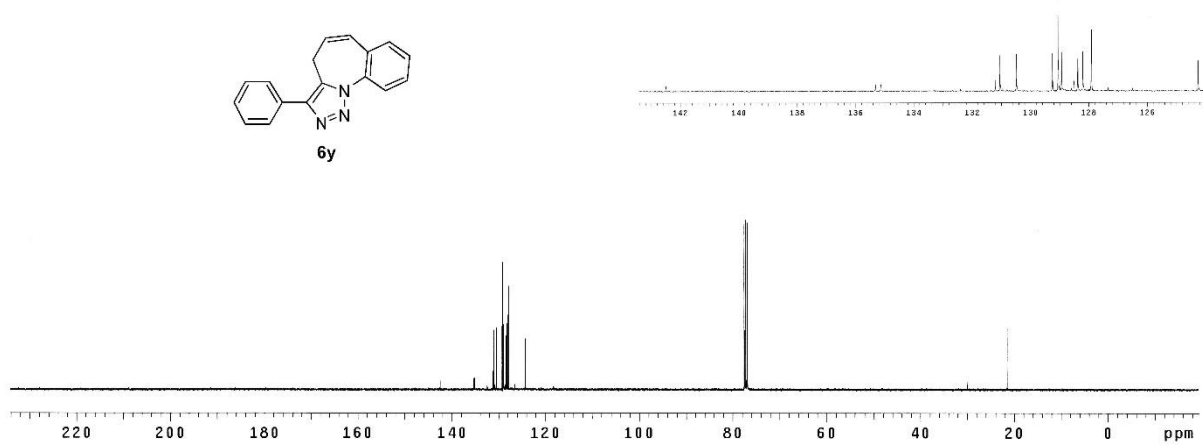

$^1\text{H-NMR}$  &  $^{13}\text{C-NMR}$  of **6z**

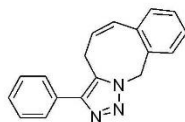

**6z**

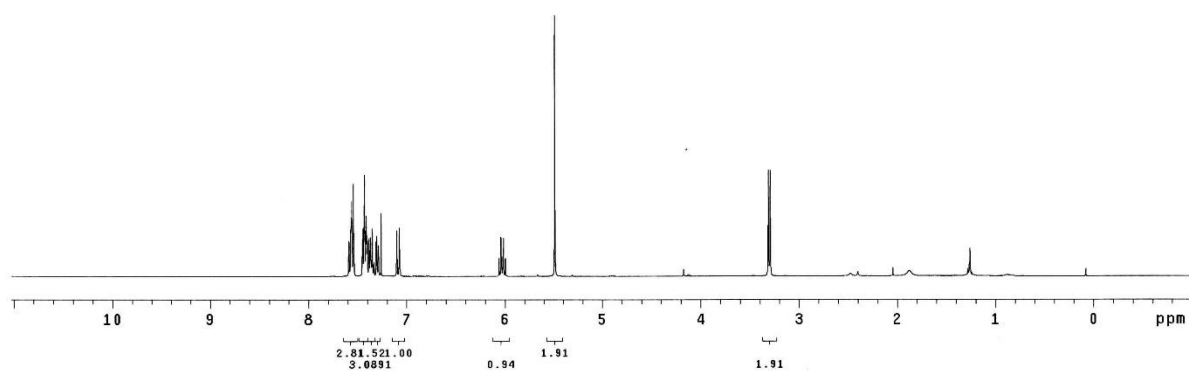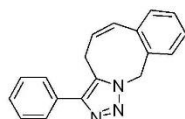

**6z**

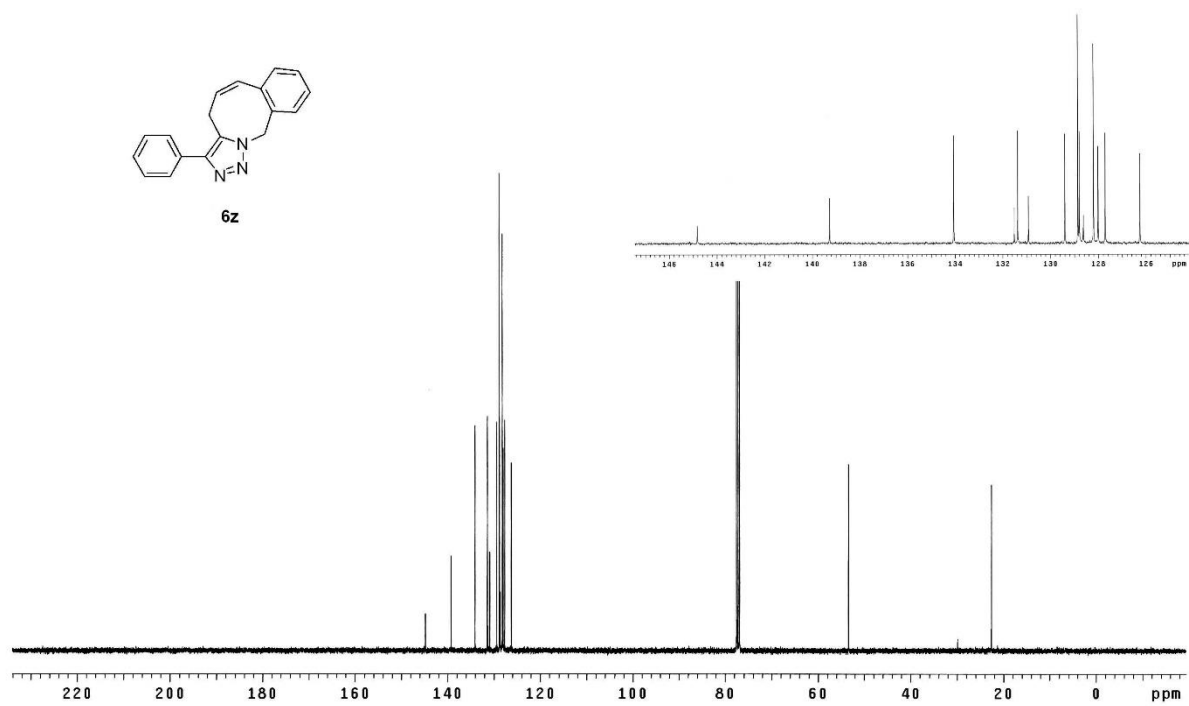

Supplement: c7ra12889d1.pdf [file c7ra12889d1.pdf]
